# Supplementary material for: Design, Synthesis, and Biological Activities of Novel 2-Cyanoacrylate Compounds Containing Substituted Pyrazolyl or 1,2,3-Triazolyl Moiety
Source: MDPI journal article supplement (doi:10.3390/molecules28073141), 2023-03-31
Supplement: s1 [file s1]

## Supporting Information

# Design, Synthesis, and Biological Activities of Novel 2-Cyanoacrylate Compounds Containing Substituted Pyrazolyl or 1,2,3-Triazolyl Moiety

Yang Wang <sup>†</sup>, Yudie Chen <sup>†</sup>, Ye Qian, Jia Chen, Xianchao Du, Yujun Shi <sup>\*</sup>, Baolin Xu, Sheng Hua and Hong Dai <sup>\*</sup>

College of Chemistry and Chemical Engineering, Nantong University, Nantong 226019, China; k765786104@163.com (Y.W.); chenyudie2023@163.com (Y.C.); qq1186937868@163.com (Y.Q.); 15642891665@163.com (J.C.); fyuan6586@aliyun.com (X.D.); 19840134319@163.com (B.X.); yaowei265688@126.com (S.H.)

<sup>\*</sup> Correspondence: syj@ntu.edu.cn (Y.S.); dh123@ntu.edu.cn (H.D.); Tel./Fax: +86-513-8501-2851 (Y.S.); +86-513-8501-2945 (H.D.)

<sup>†</sup> These authors contributed equally to this work.

The  $^1\text{H}$ -NMR and  $^{13}\text{C}$ -NMR spectra of compounds **4a**, **4b**, **5a**, **5b**, **9a–9i** and **10a – 10o** were listed below:

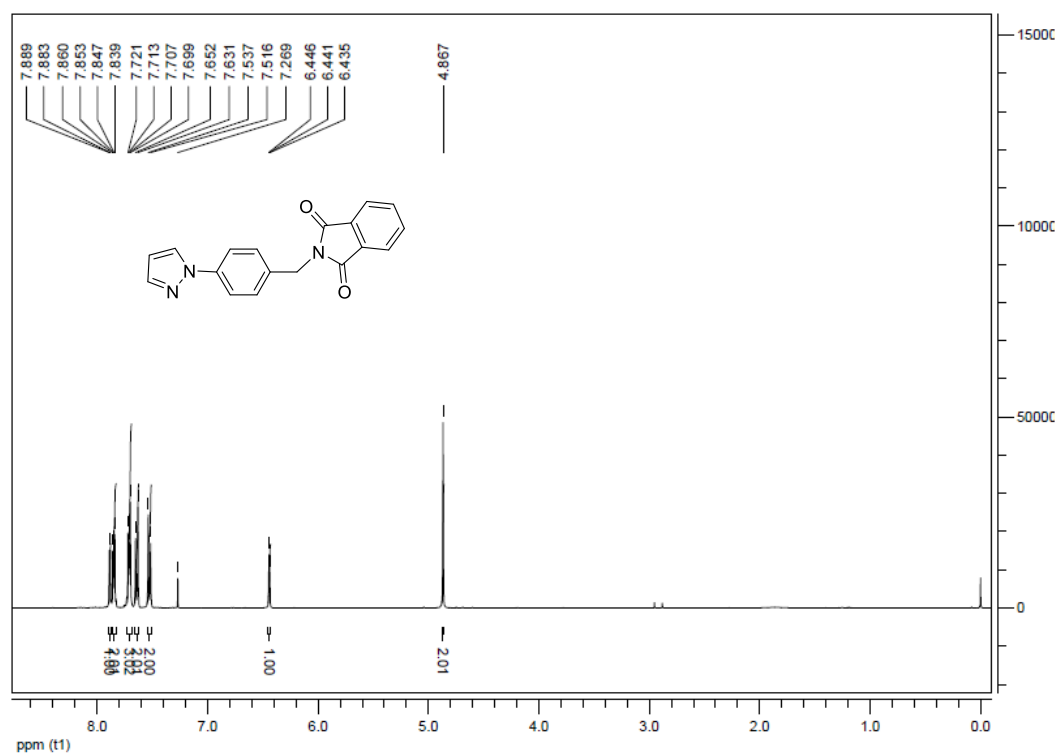

**Figure S1.**  $^1\text{H}$ -NMR of compound **4a** (400 MHz,  $\text{CDCl}_3$ )

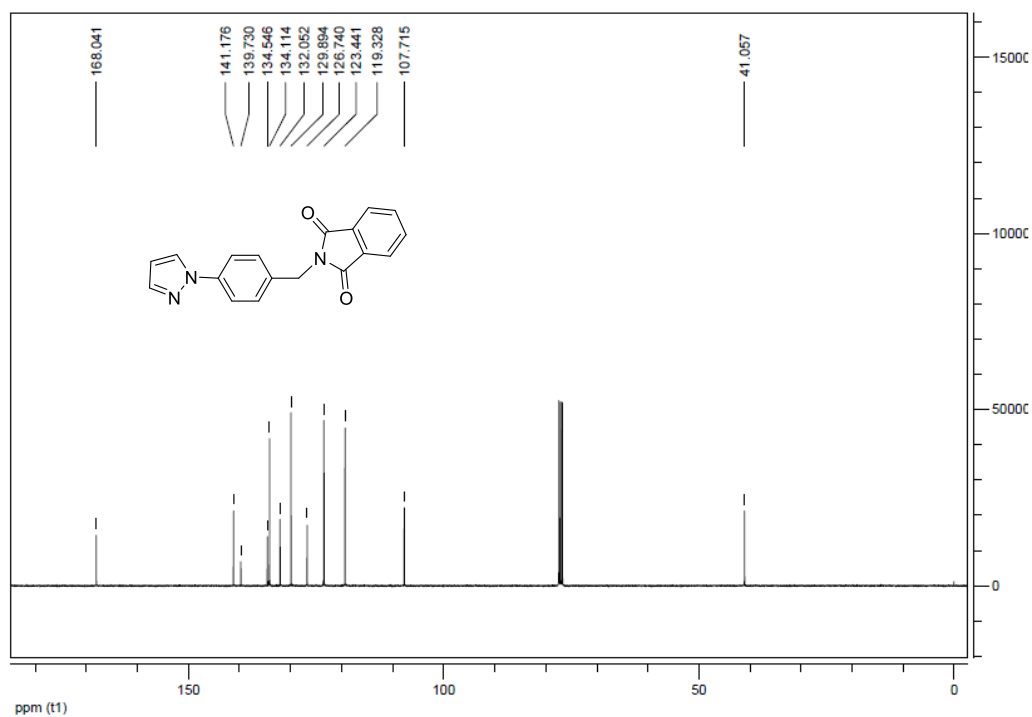

**Figure S2.**  $^{13}\text{C}$ -NMR of compound **4a** (100 MHz,  $\text{CDCl}_3$ )

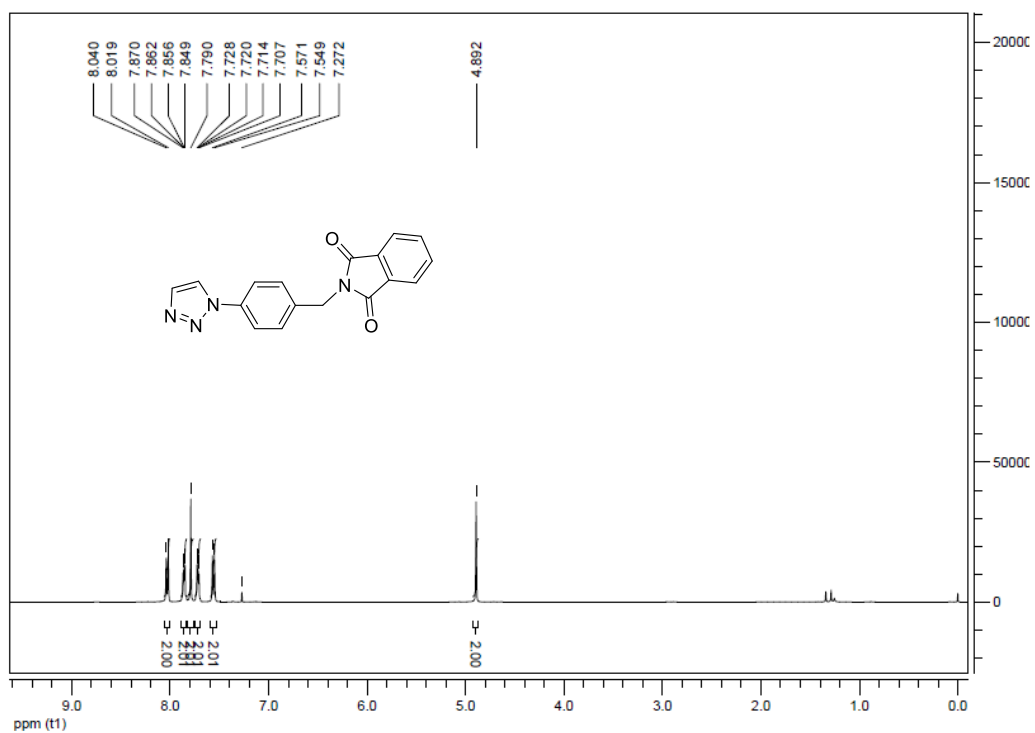

**Figure S3.** <sup>1</sup>H-NMR of compound **4b** (400 MHz, CDCl<sub>3</sub>)

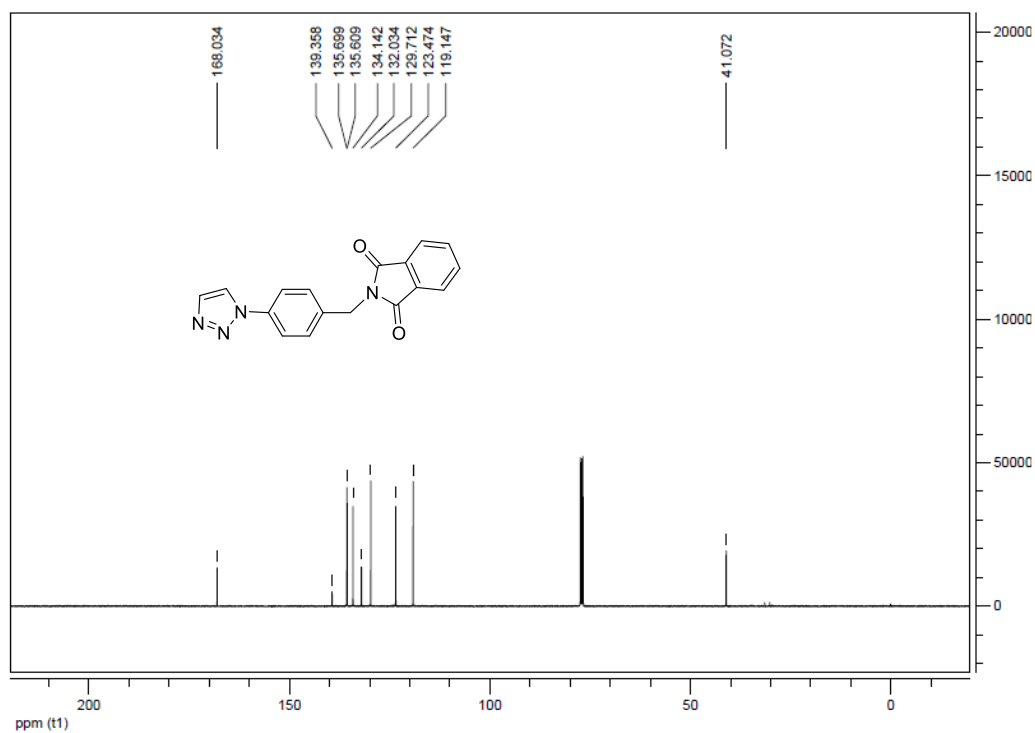

**Figure S4.** <sup>13</sup>C-NMR of compound **4b** (100 MHz, CDCl<sub>3</sub>)

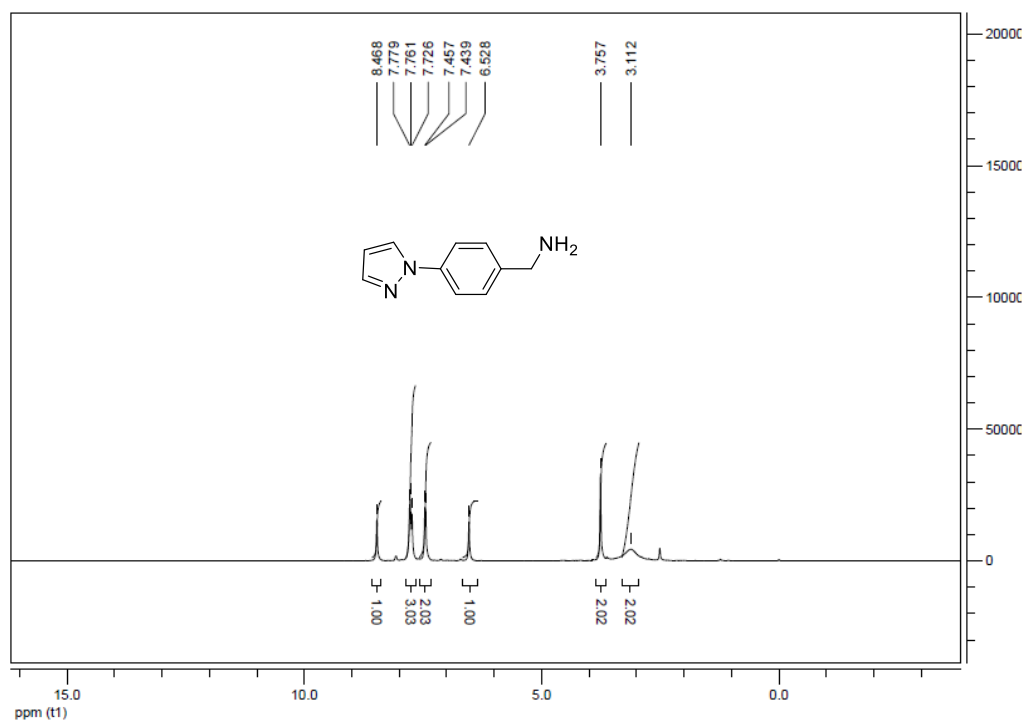

**Figure S5.**  $^1\text{H}$ -NMR of compound **5a** (400 MHz,  $\text{DMSO-}d_6$ )

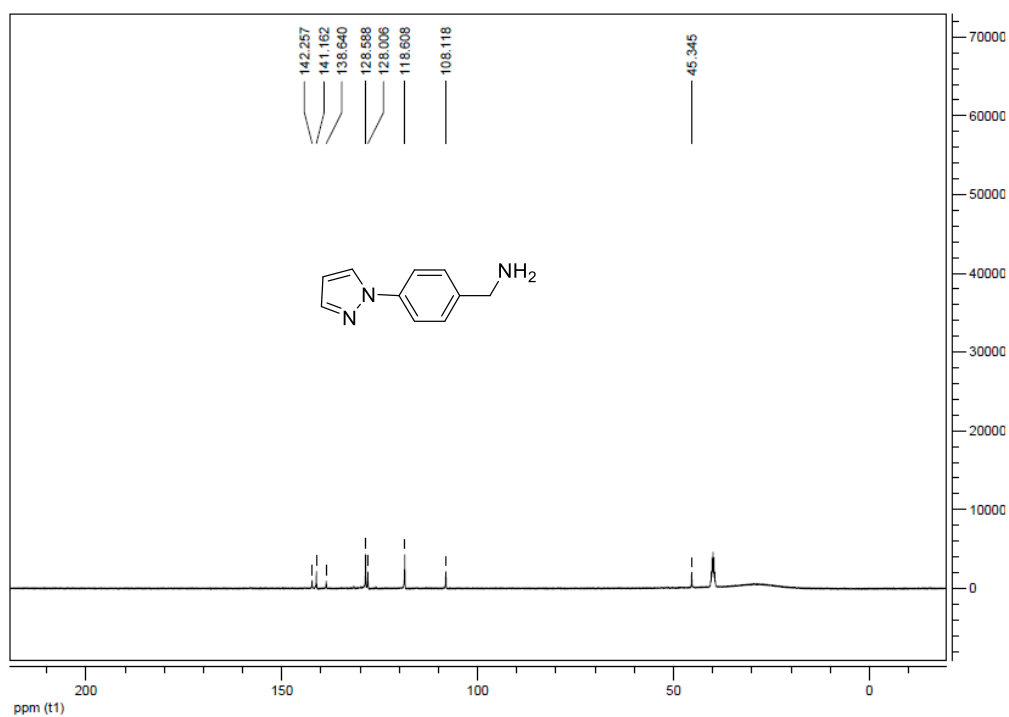

**Figure S6.**  $^{13}\text{C}$ -NMR of compound **5a** (100 MHz,  $\text{DMSO-}d_6$ )

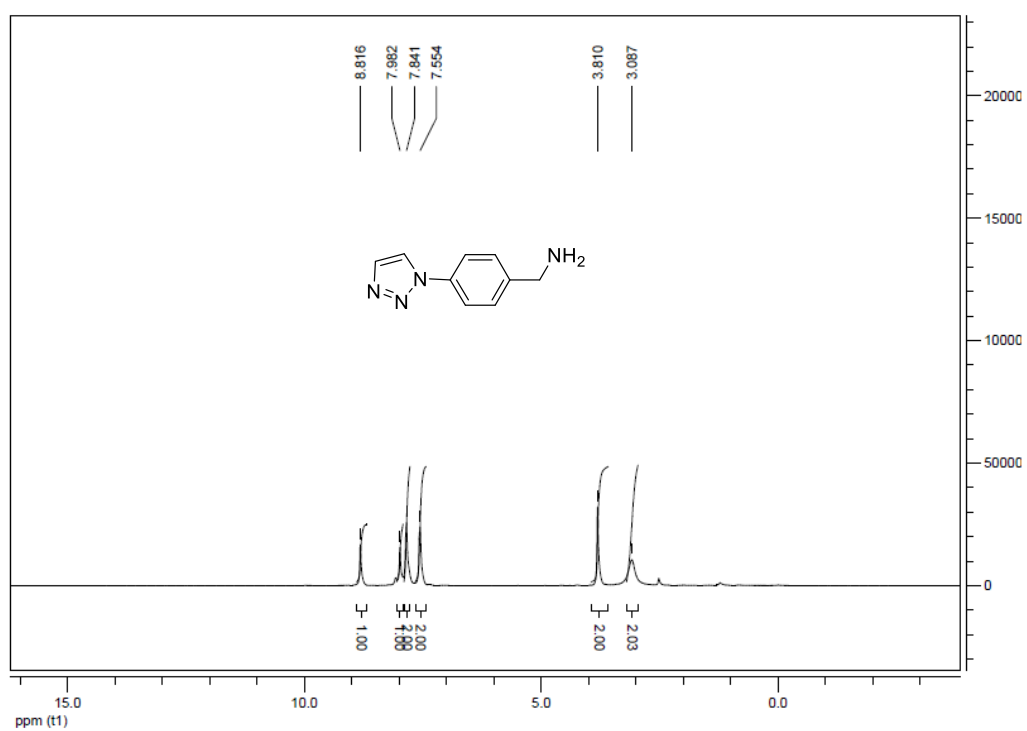

**Figure S7.** <sup>1</sup>H-NMR of compound **5b** (400 MHz, DMSO-*d*<sub>6</sub>)

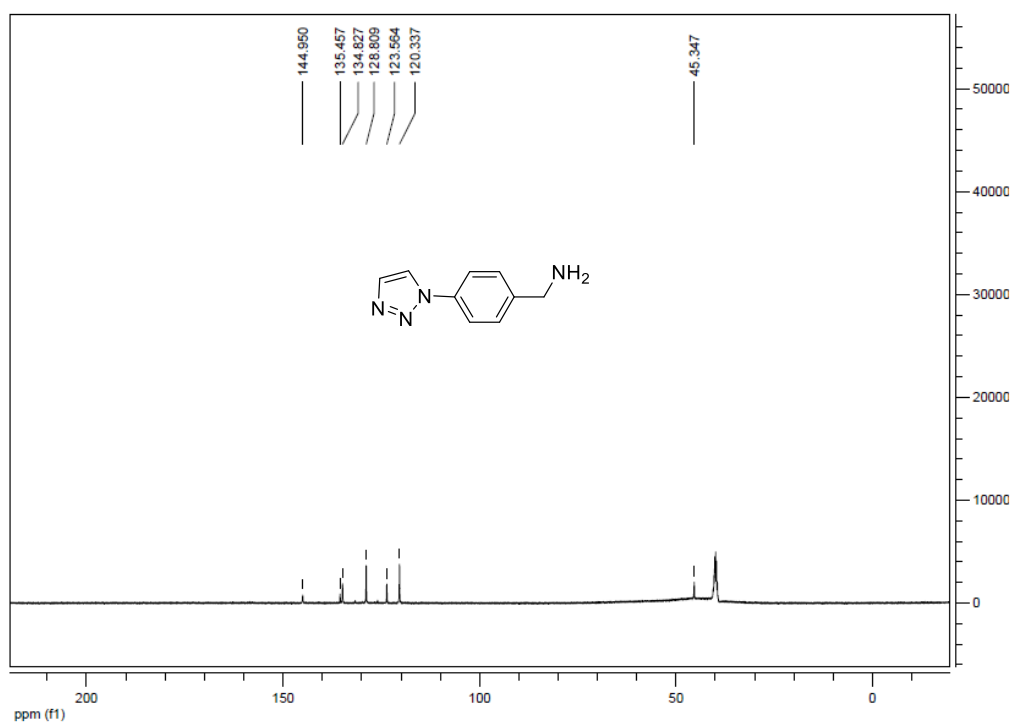

**Figure S8.** <sup>13</sup>C-NMR of compound **5b** (100 MHz, DMSO-*d*<sub>6</sub>)

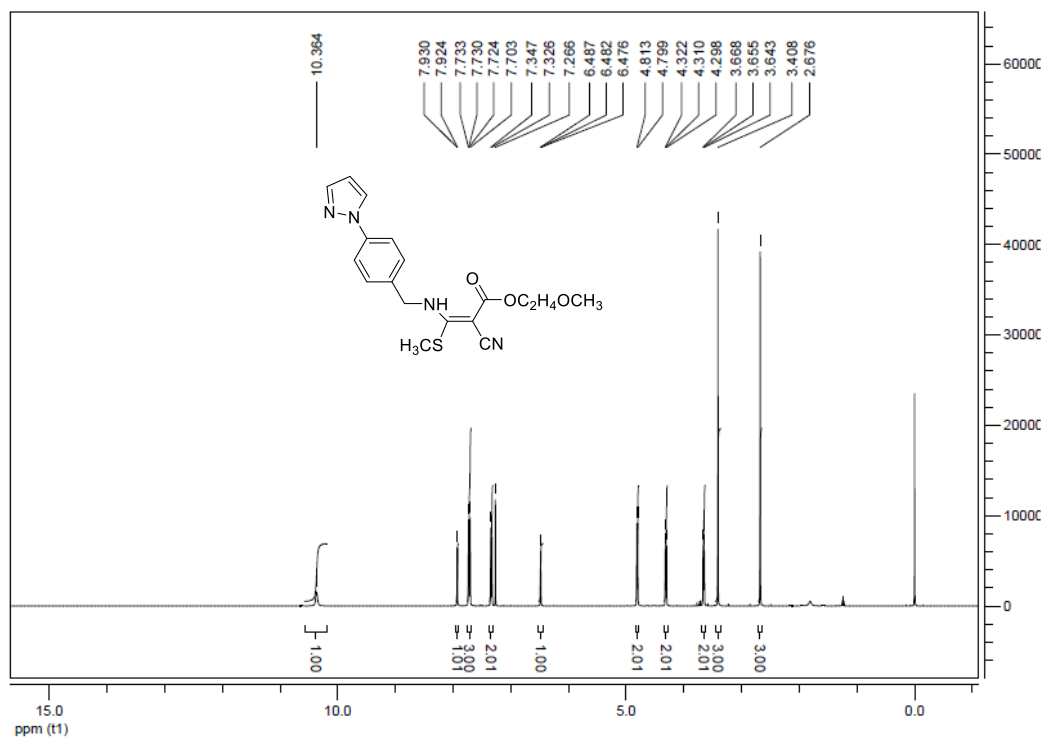

Figure S9. <sup>1</sup>H-NMR of compound 9a (400 MHz, CDCl<sub>3</sub>)

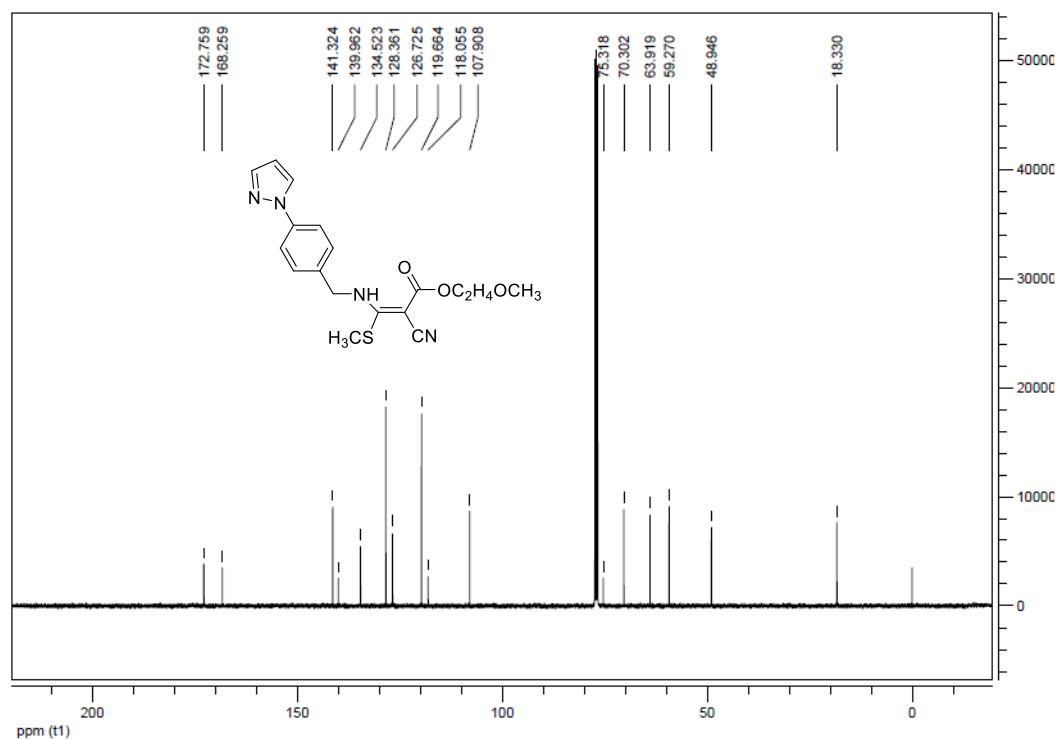

Figure S10. <sup>13</sup>C-NMR of compound 9a (100 MHz, CDCl<sub>3</sub>)

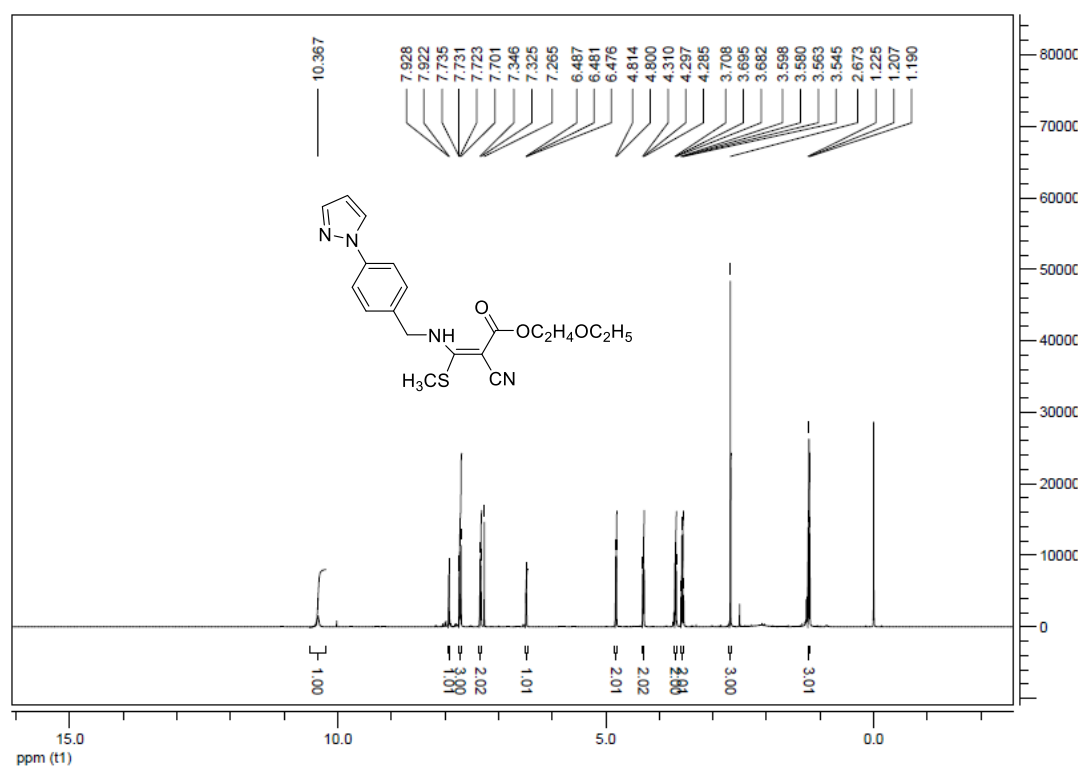

**Figure S11.** <sup>1</sup>H-NMR of compound **9b** (400 MHz, CDCl<sub>3</sub>).

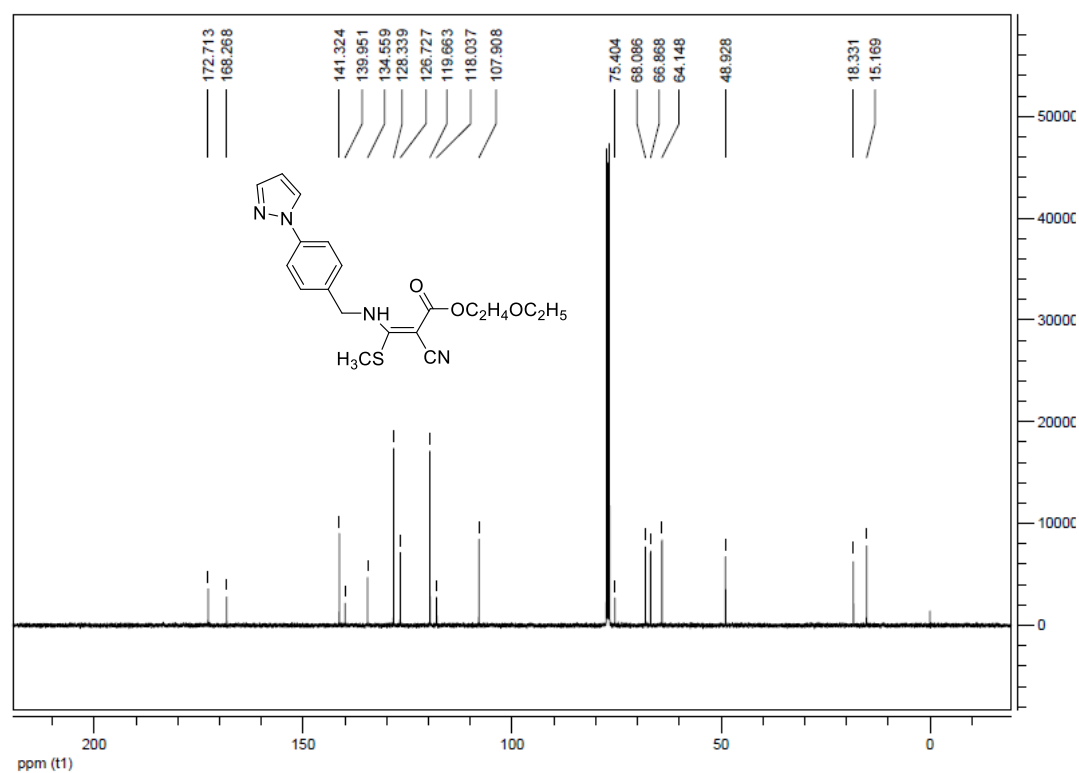

**Figure S12.** <sup>13</sup>C-NMR of compound **9b** (100 MHz, CDCl<sub>3</sub>).

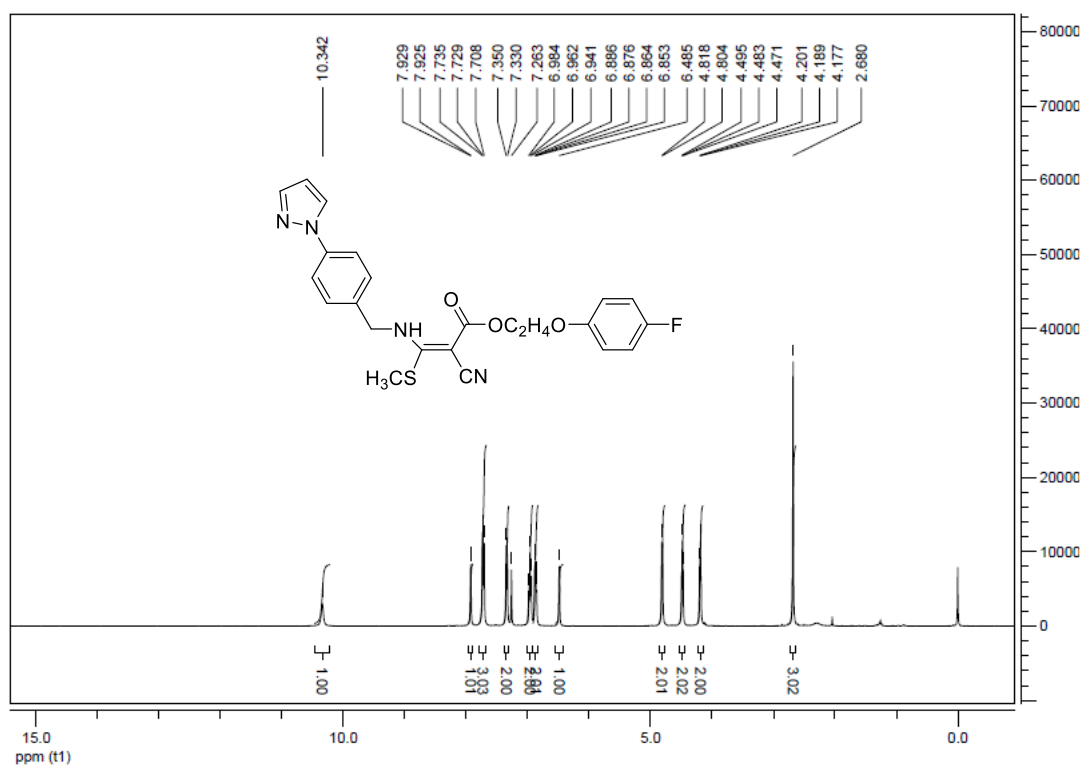

**Figure S13.** <sup>1</sup>H-NMR of compound 9c (400 MHz, CDCl<sub>3</sub>)

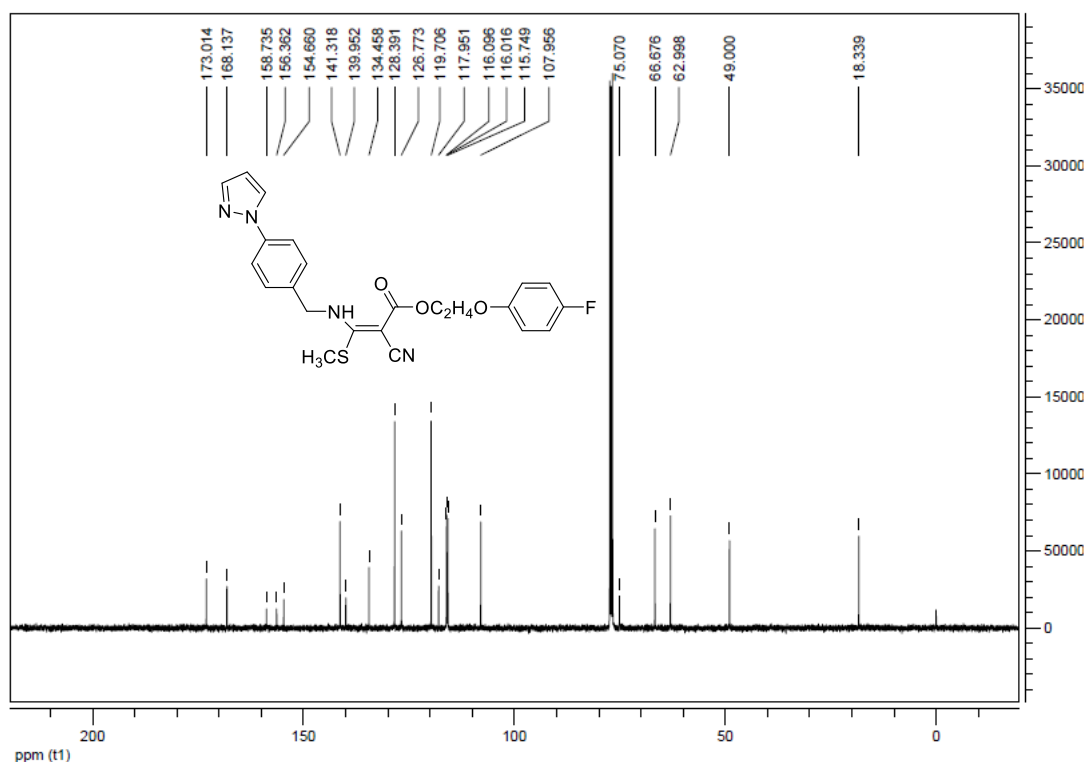

**Figure S14.** <sup>13</sup>C-NMR of compound 9c (400 MHz, CDCl<sub>3</sub>)



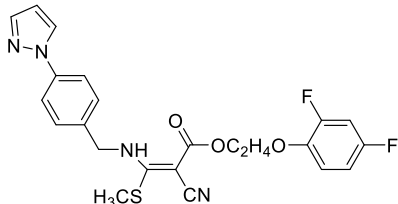

**Figure S15.**  $^1\text{H}$ -NMR of compound **9d** (400 MHz,  $\text{CDCl}_3$ )

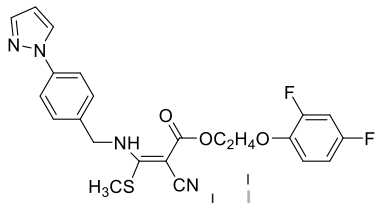

**Figure S16.**  $^{13}\text{C}$ -NMR of compound **9d** (100 MHz,  $\text{CDCl}_3$ )

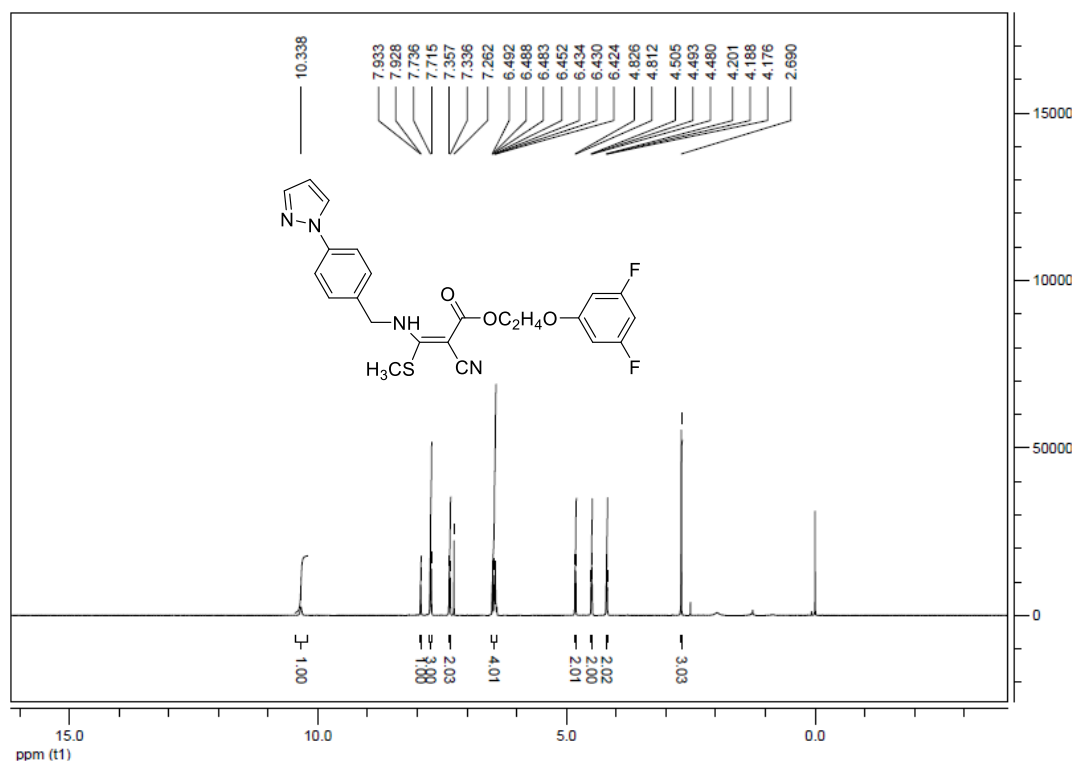

**Figure S17.** <sup>1</sup>H-NMR of compound **9e** (400 MHz, CDCl<sub>3</sub>)

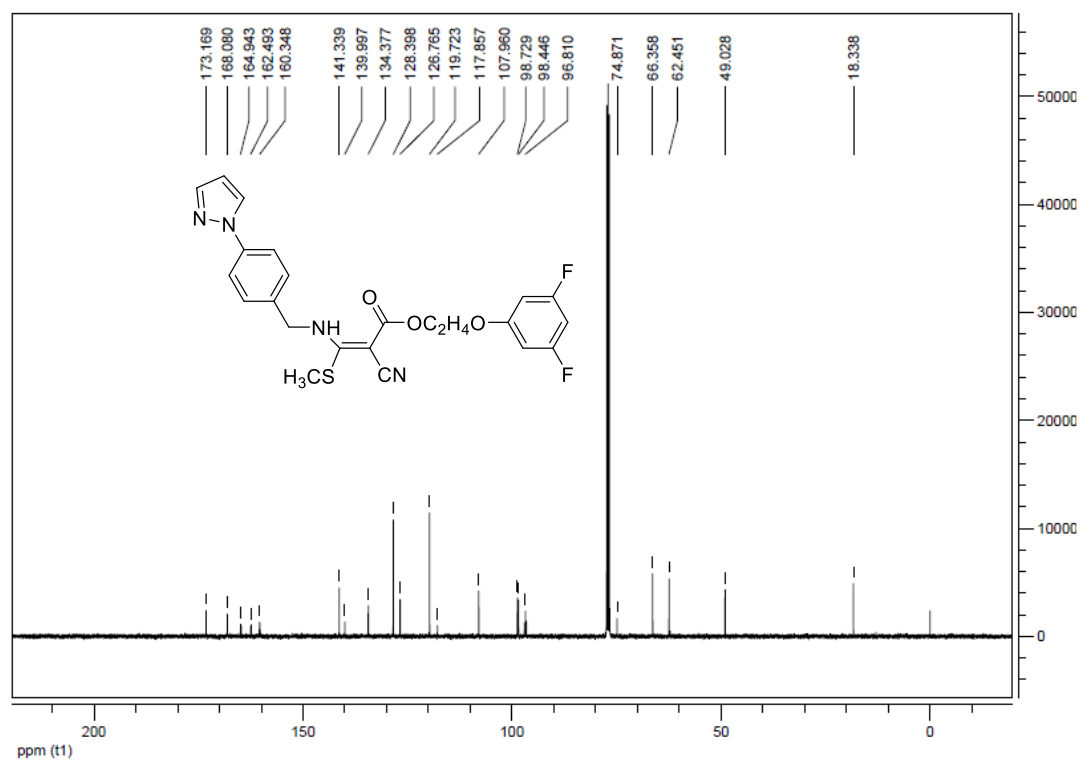

**Figure S18.** <sup>13</sup>C-NMR of compound **9e** (100 MHz, CDCl<sub>3</sub>)

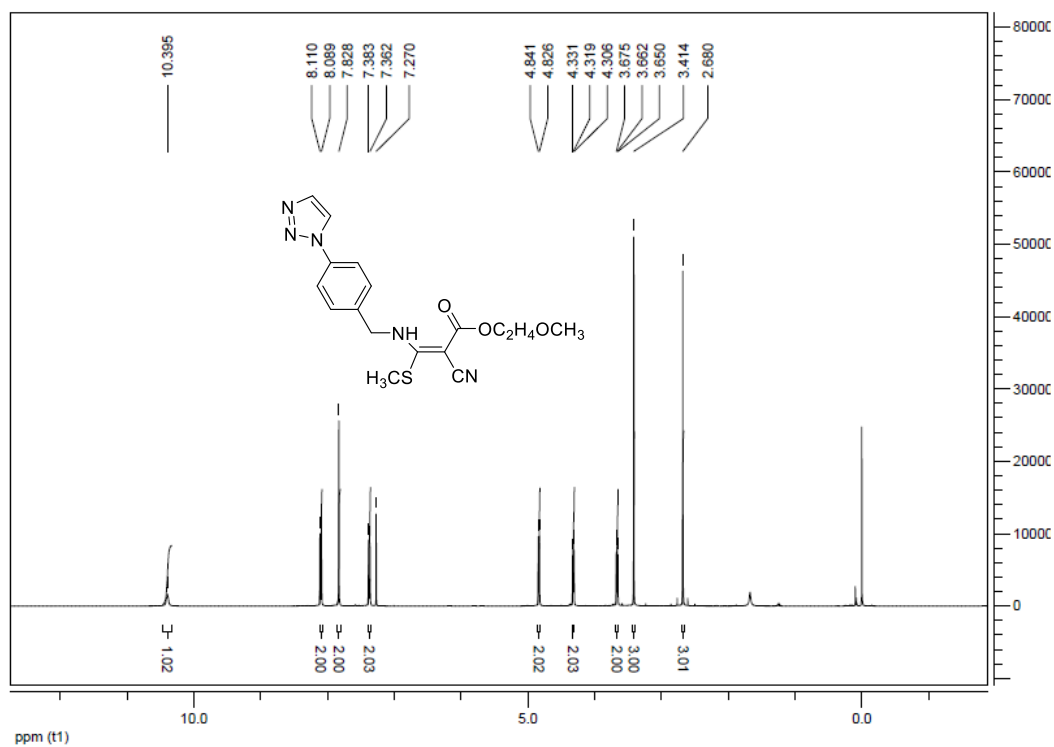

**Figure S19.**  $^1\text{H}$ -NMR of compound **9f** (400 MHz,  $\text{CDCl}_3$ )

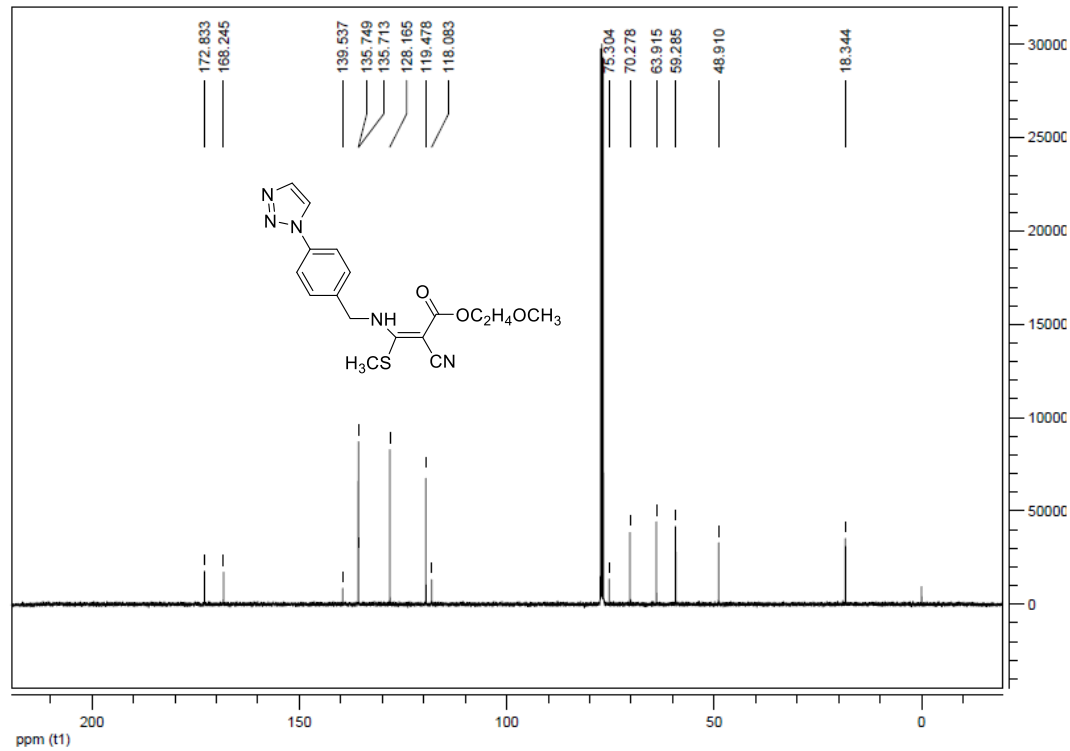

**Figure S20.**  $^{13}\text{C}$ -NMR of compound **9f** (100 MHz,  $\text{CDCl}_3$ )

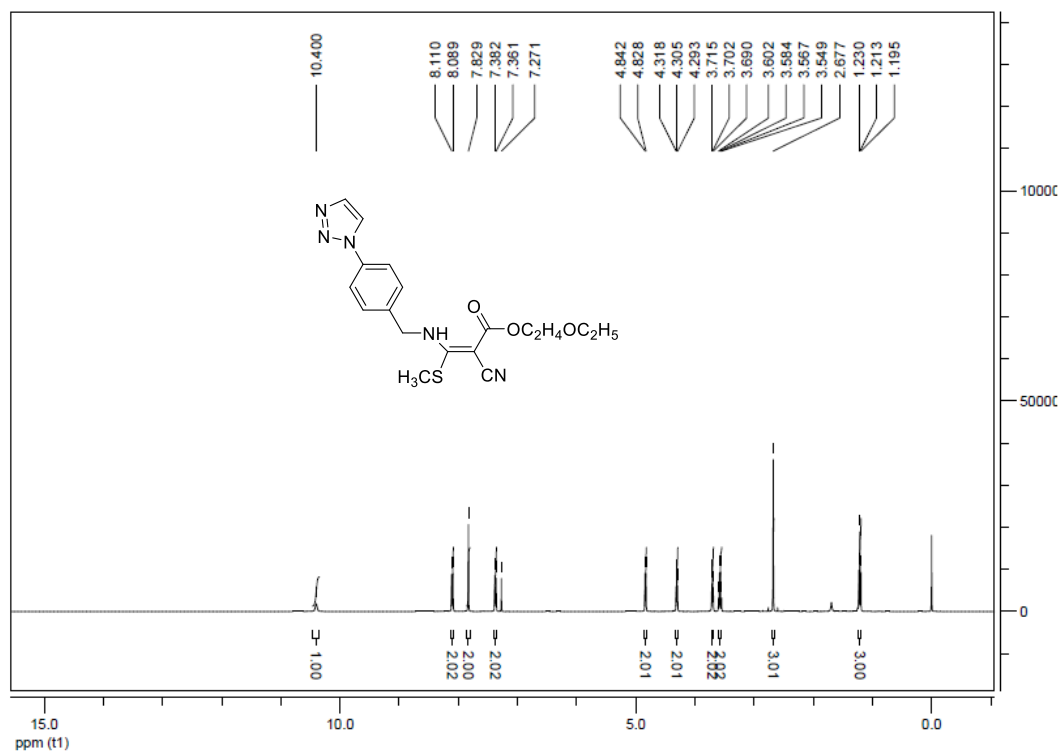

**Figure S21.**  $^1\text{H}$ -NMR of compound **9g** (400 MHz,  $\text{CDCl}_3$ )

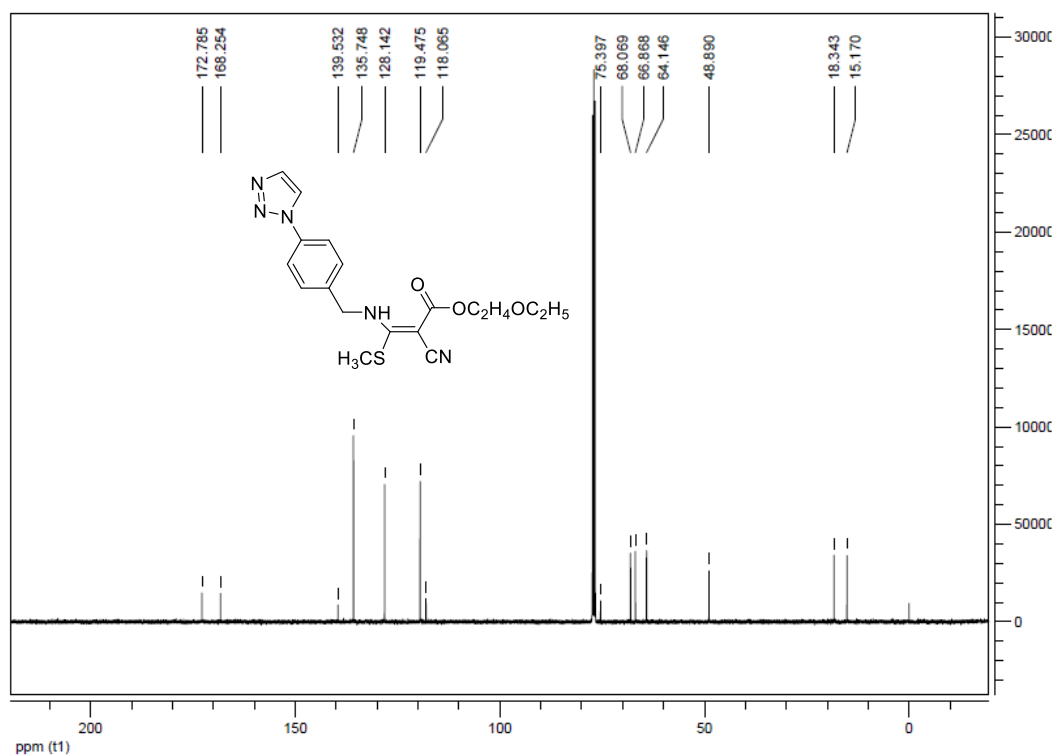

**Figure S22.**  $^{13}\text{C}$ -NMR of compound **9g** (100 MHz,  $\text{CDCl}_3$ )

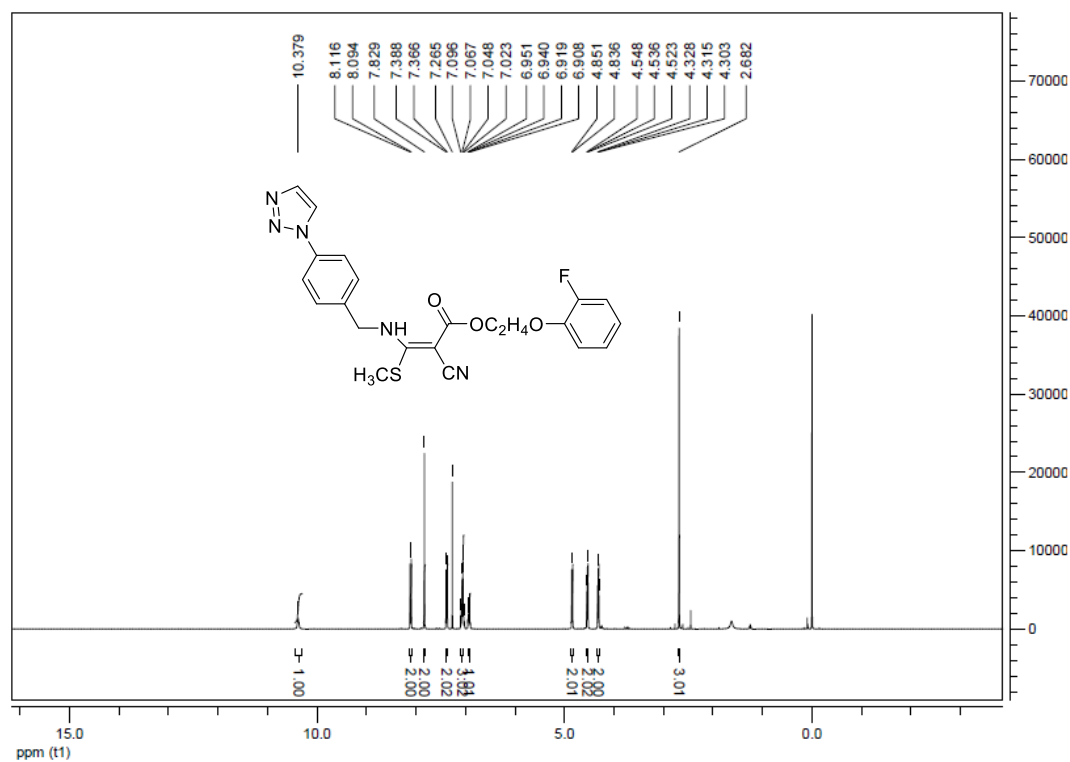

**Figure S23.** <sup>1</sup>H-NMR of compound **9h** (400 MHz, CDCl<sub>3</sub>)

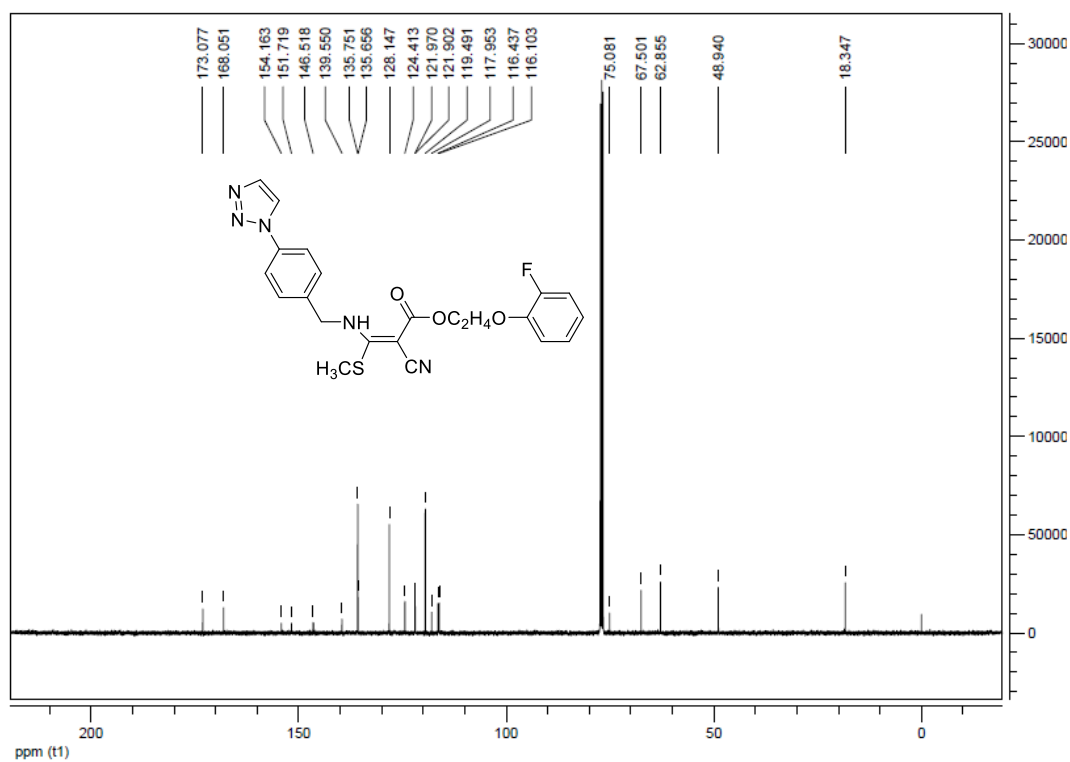

**Figure S24.** <sup>13</sup>C-NMR of compound **9h** (100 MHz, CDCl<sub>3</sub>)

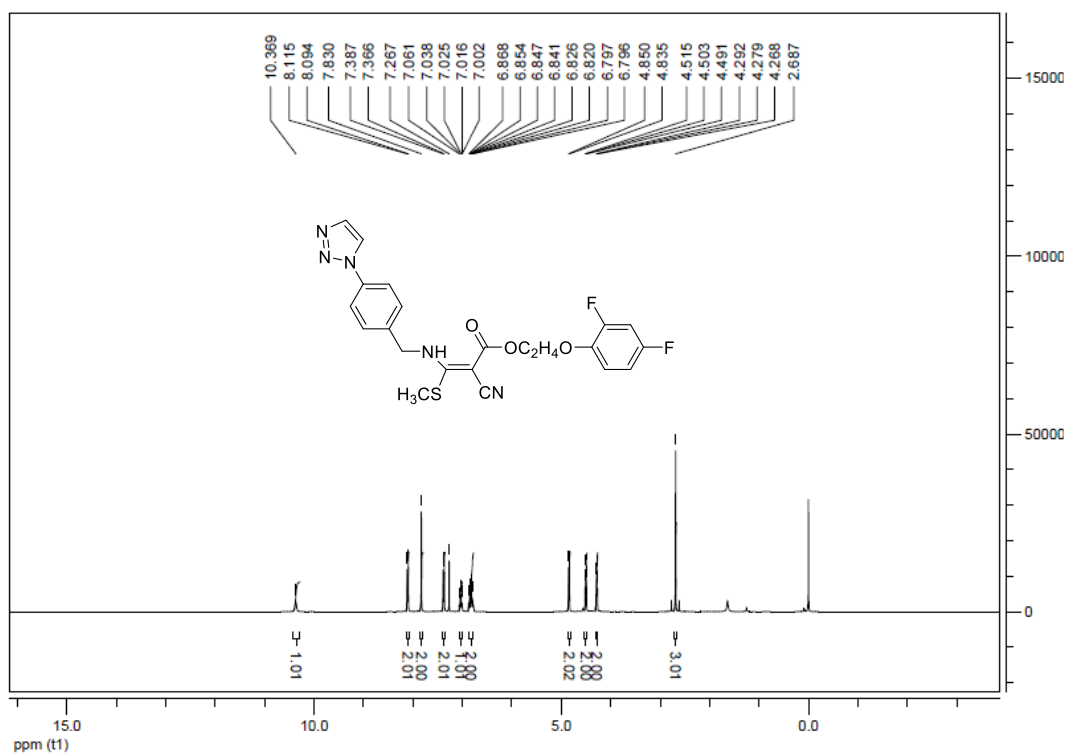

**Figure S25.** <sup>1</sup>H-NMR of compound **9i** (400 MHz, CDCl<sub>3</sub>)

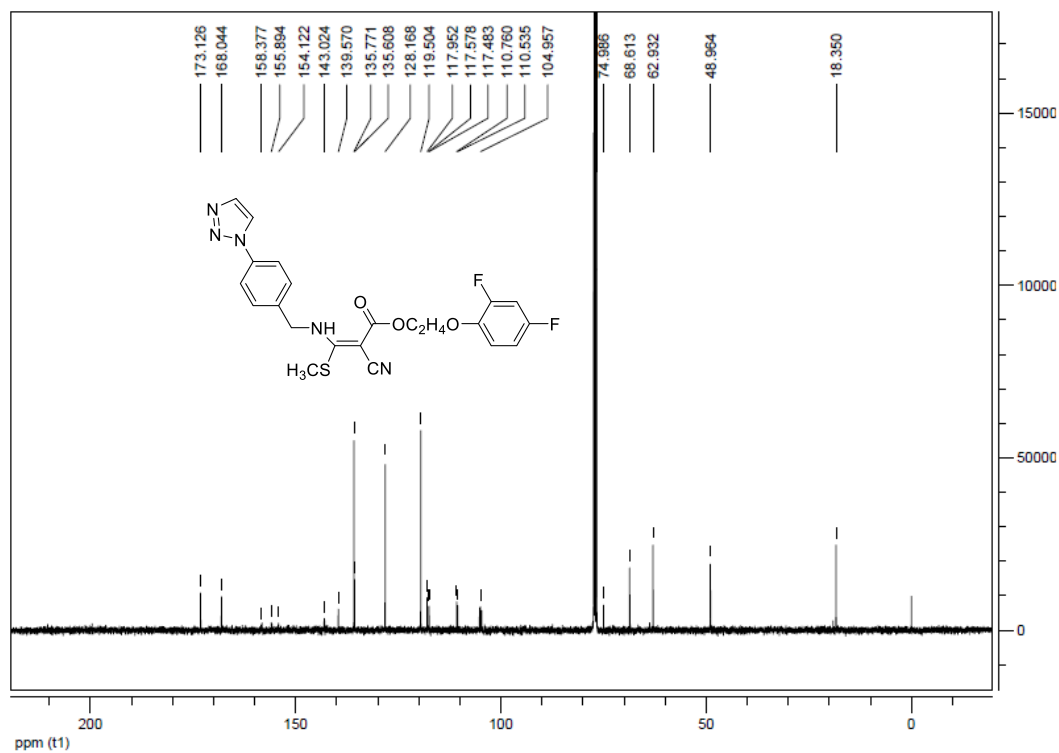

**Figure S26.** <sup>13</sup>C-NMR of compound **9i** (100 MHz, CDCl<sub>3</sub>)

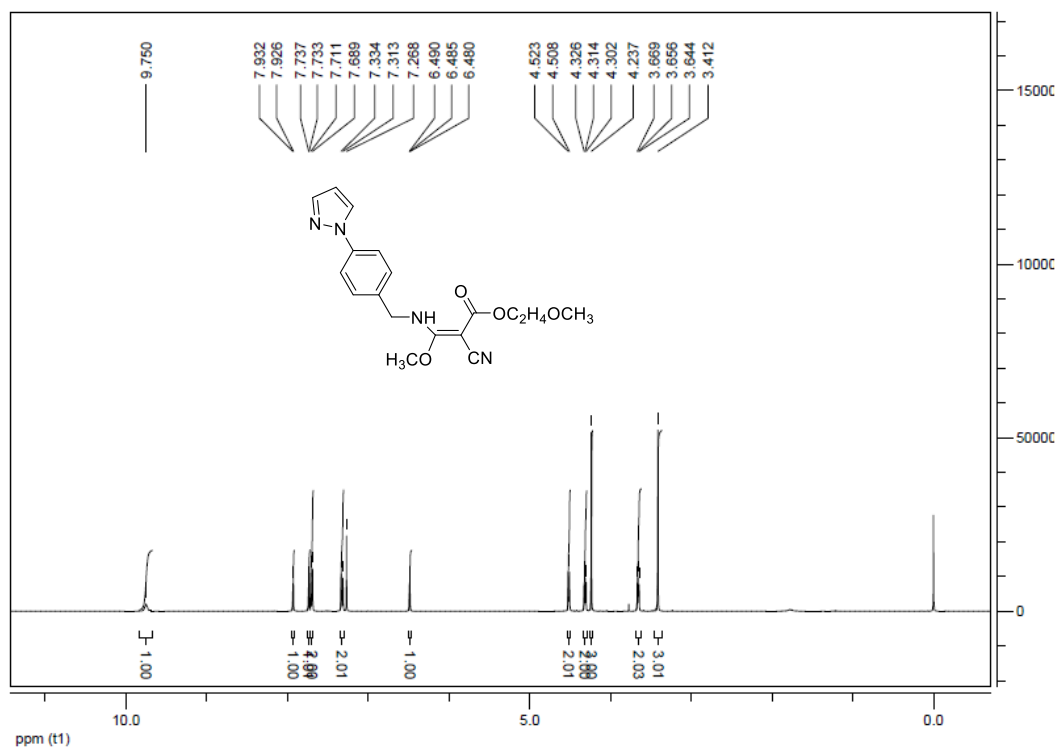

Figure S27. <sup>1</sup>H-NMR of compound 10a (400 MHz, CDCl<sub>3</sub>)

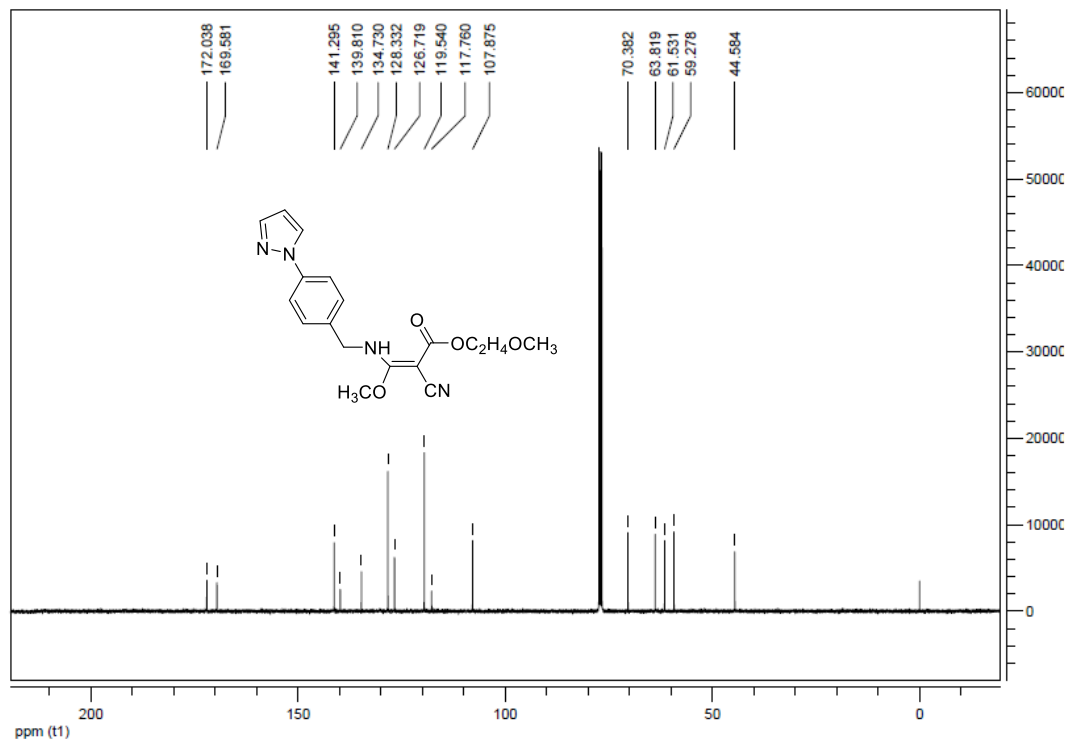

Figure S28. <sup>13</sup>C-NMR of compound 10a (100 MHz, CDCl<sub>3</sub>)

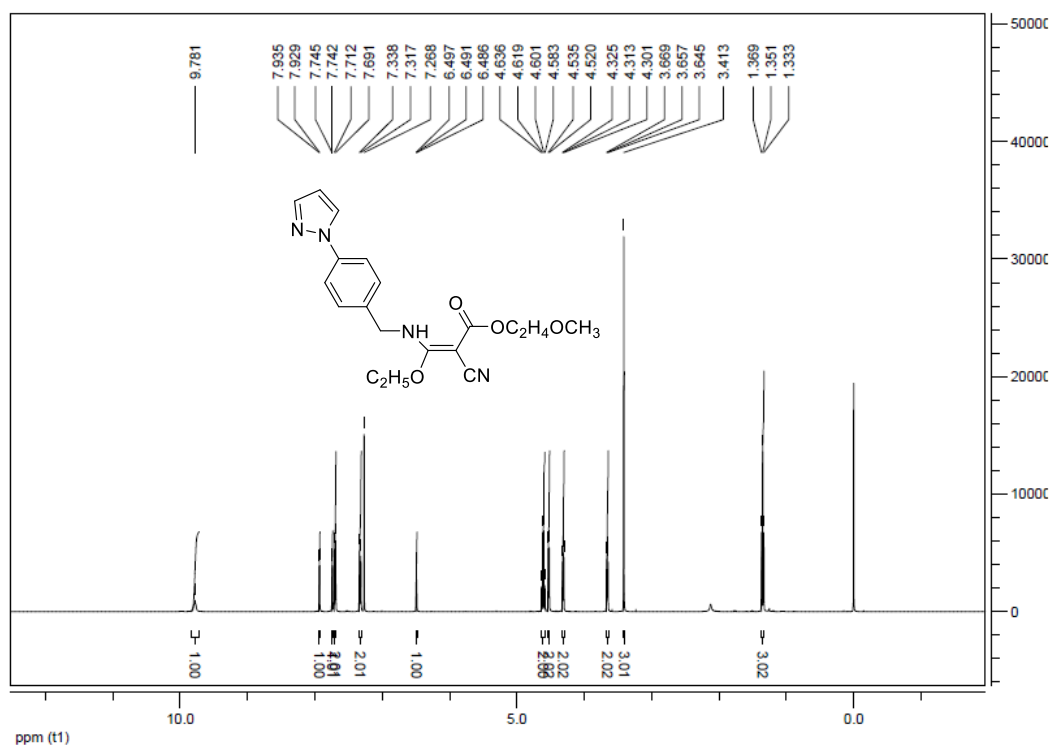

**Figure S29.** <sup>1</sup>H-NMR of compound **10b** (400 MHz, CDCl<sub>3</sub>)

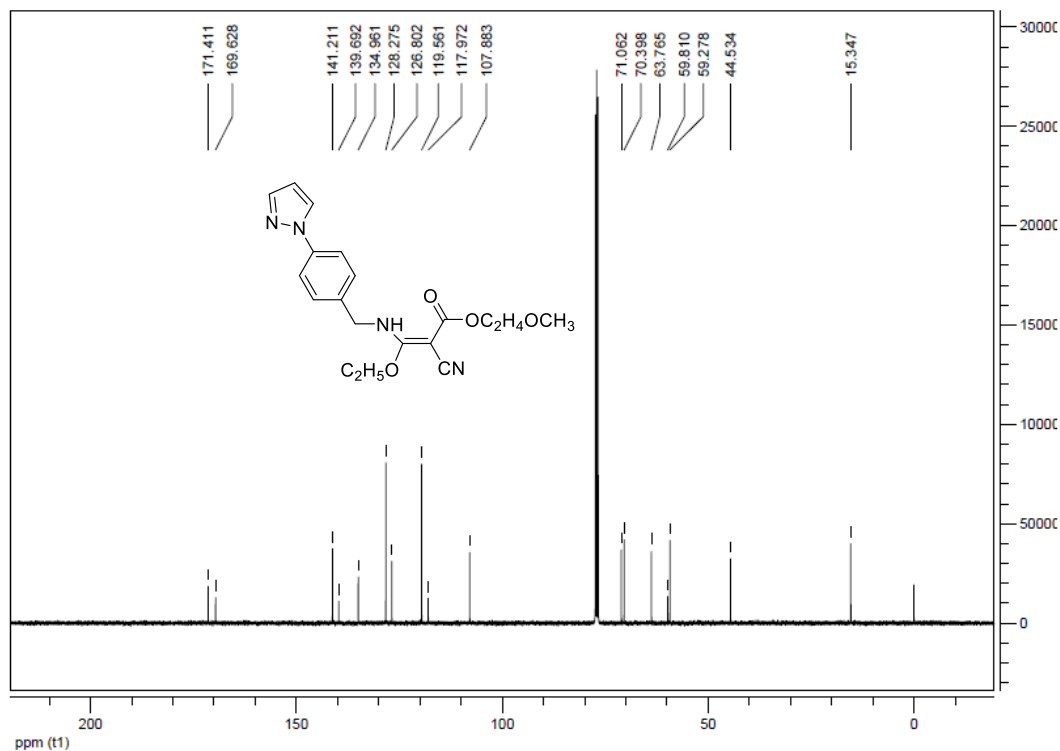

**Figure S30.** <sup>13</sup>C-NMR of compound **10b** (100 MHz, CDCl<sub>3</sub>)



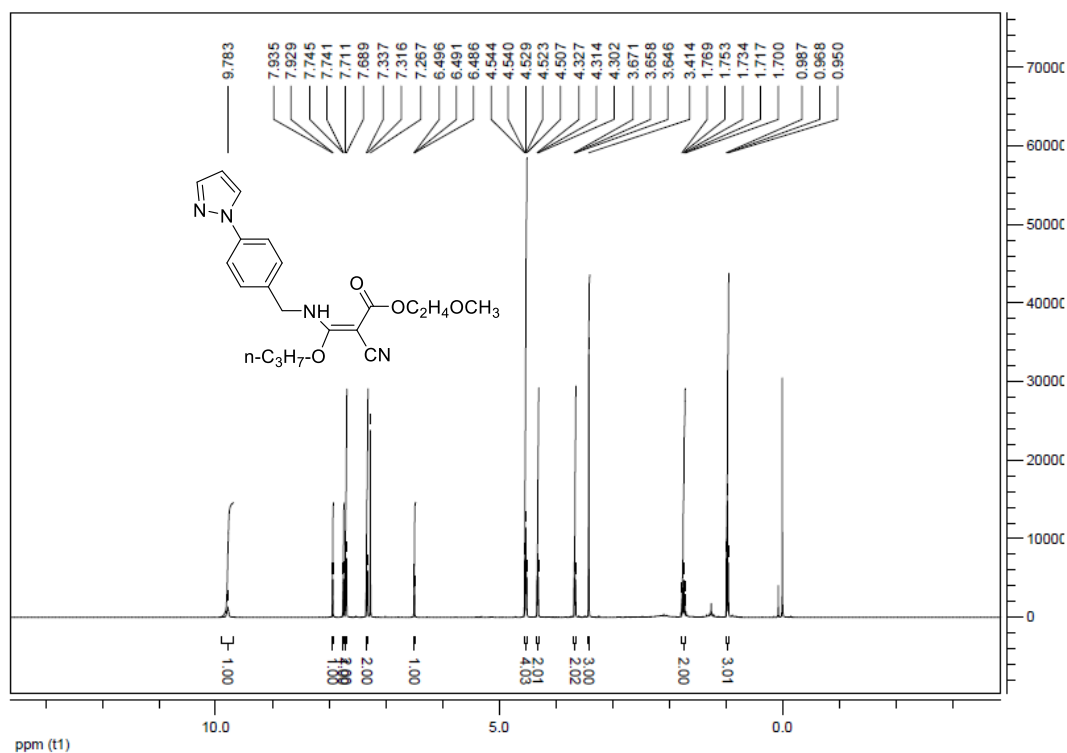

**Figure S31.**  $^1\text{H}$ -NMR of compound **10c** (400 MHz,  $\text{CDCl}_3$ )

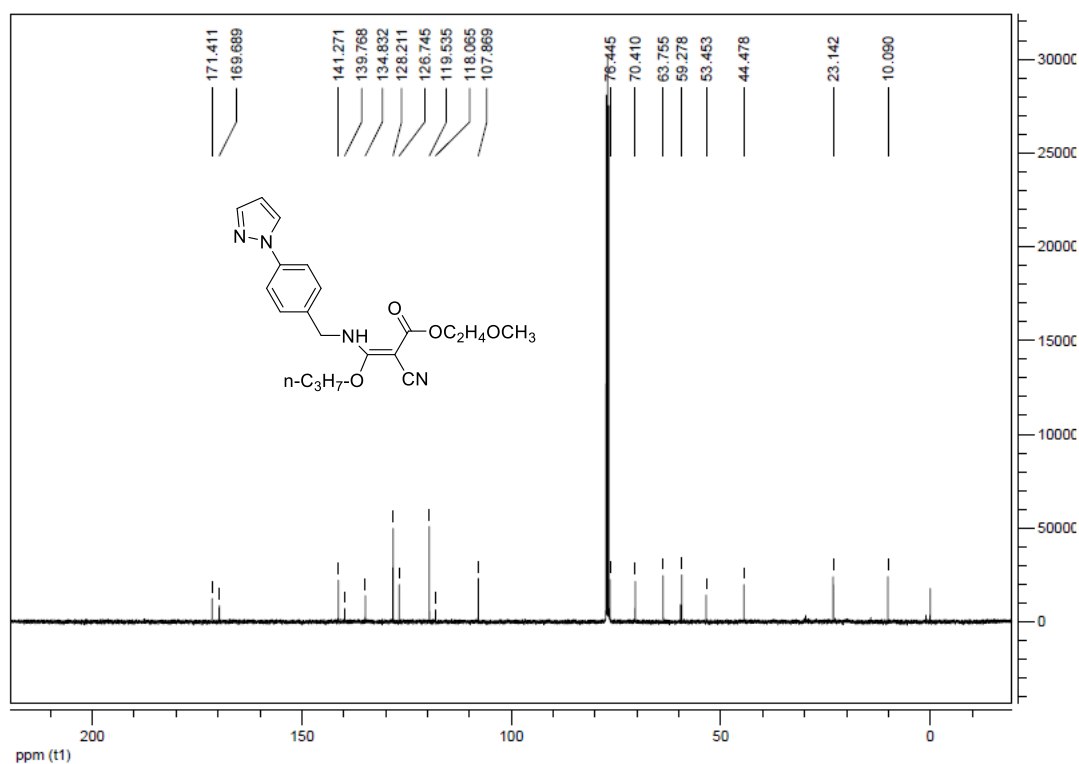

**Figure S32.**  $^{13}\text{C}$ -NMR of compound **10c** (100 MHz,  $\text{CDCl}_3$ )

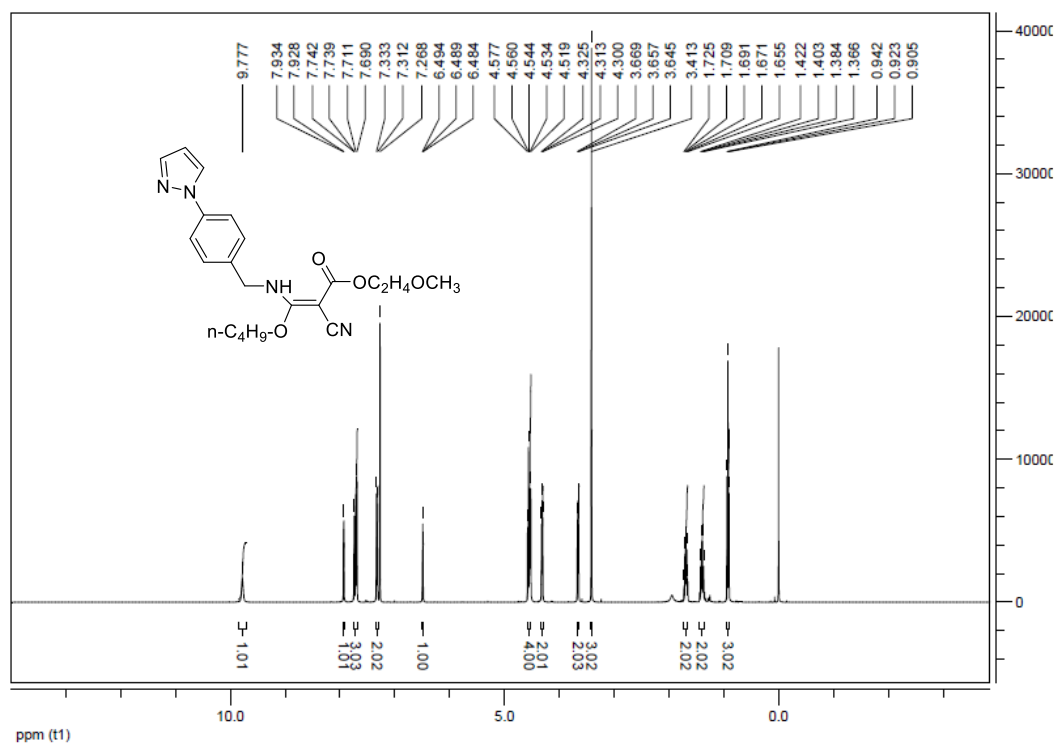

**Figure S33.** <sup>1</sup>H-NMR of compound **10d** (400 MHz, CDCl<sub>3</sub>)

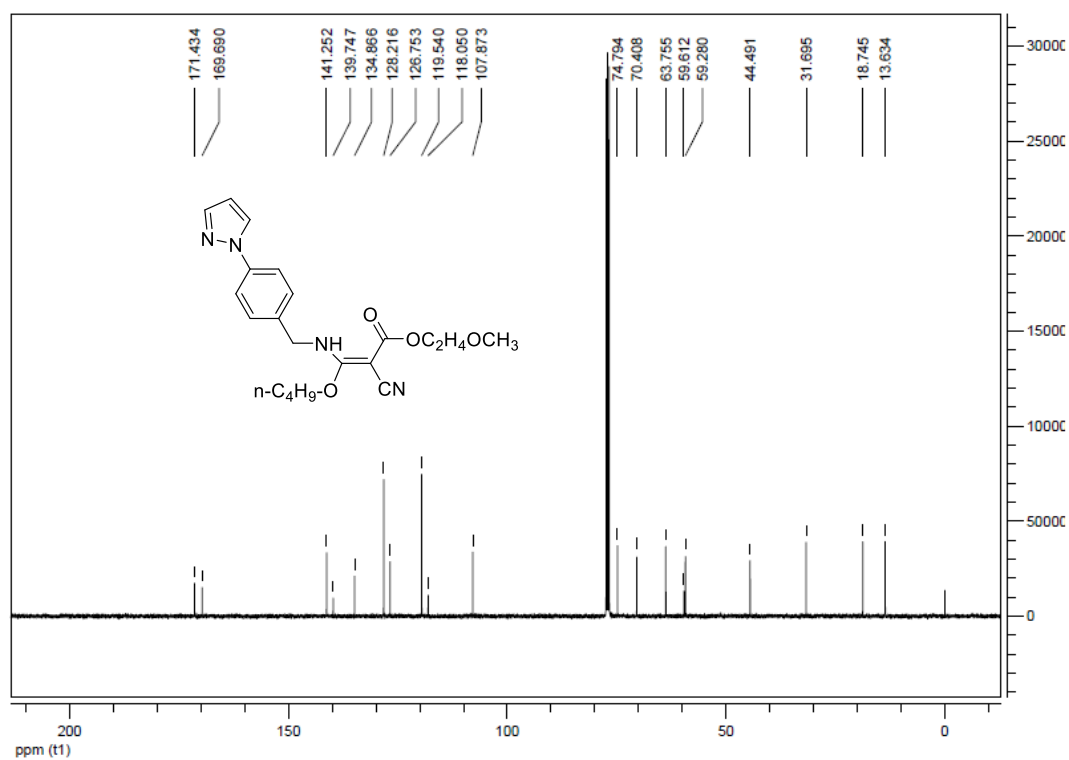

**Figure S34.** <sup>13</sup>C-NMR of compound **10d** (100 MHz, CDCl<sub>3</sub>)

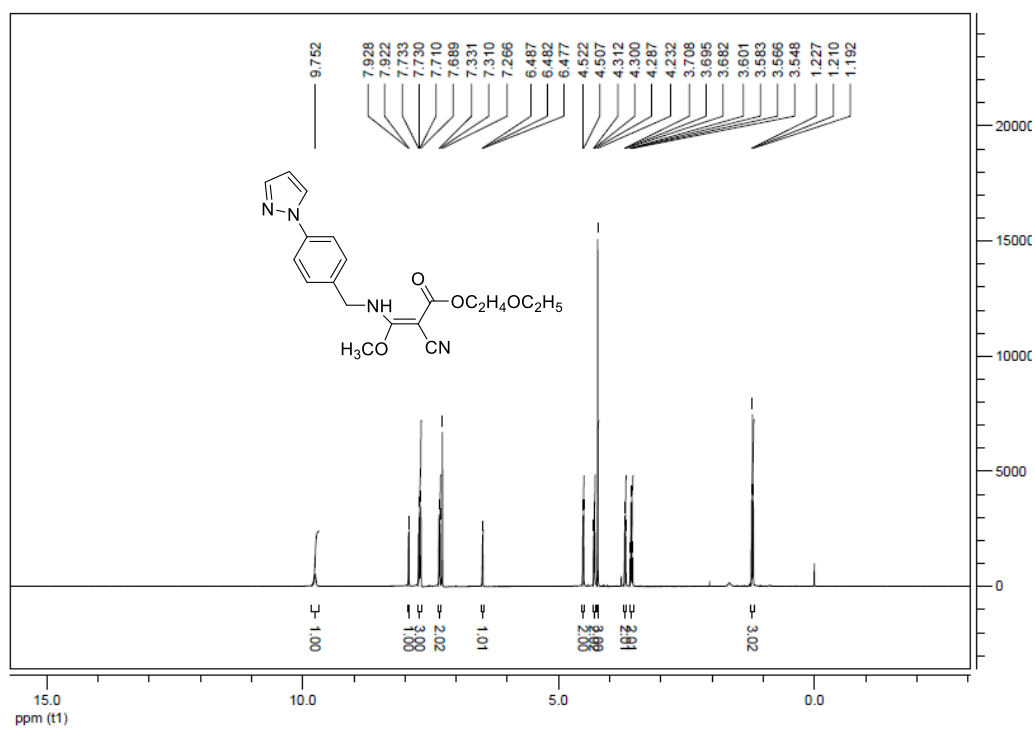

Figure S35. <sup>1</sup>H-NMR of compound 10e (400 MHz, CDCl<sub>3</sub>)

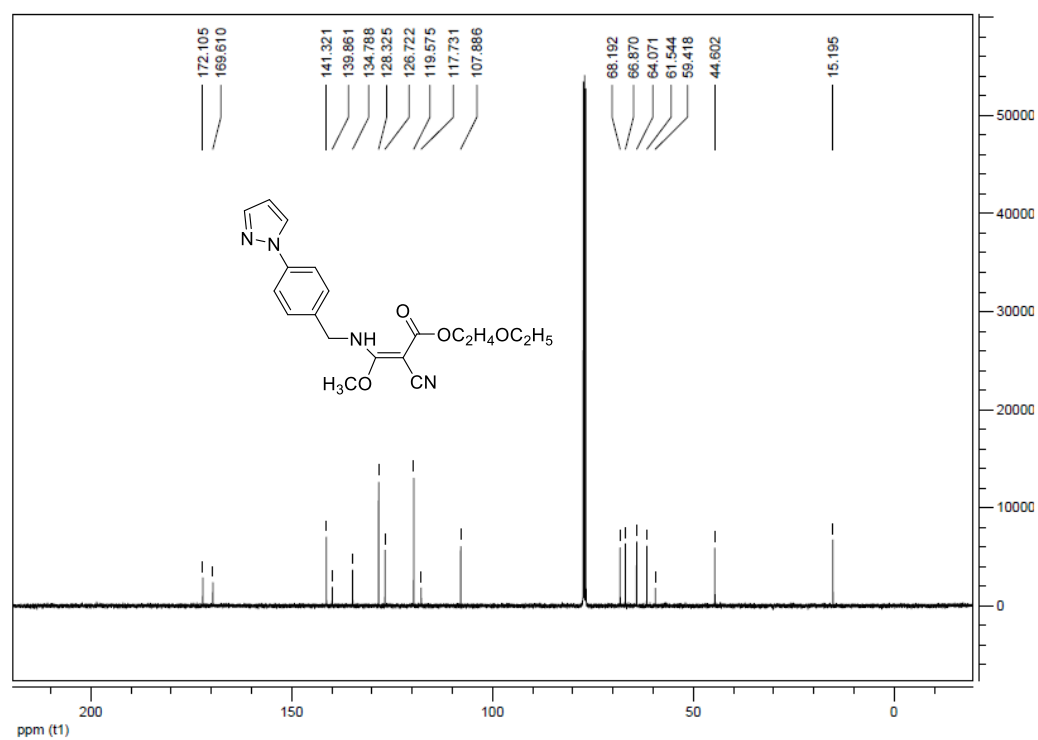

Figure S36. <sup>13</sup>C-NMR of compound 10e (100 MHz, CDCl<sub>3</sub>)

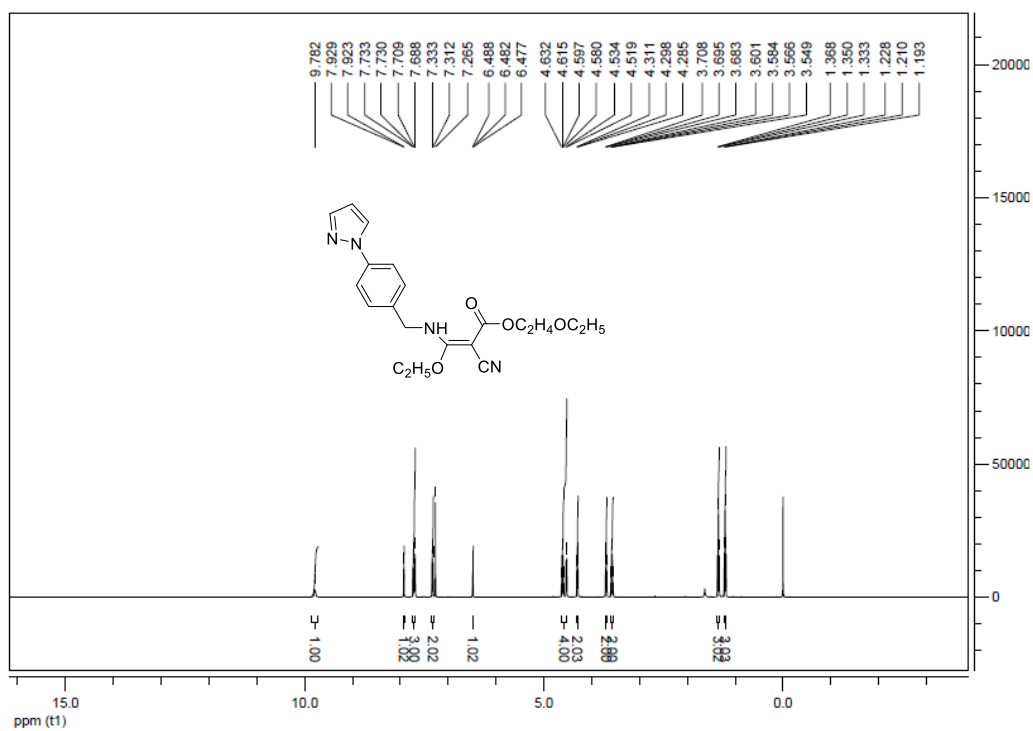

**Figure S37.**  $^1\text{H}$ -NMR of compound **10f** (400 MHz,  $\text{CDCl}_3$ )

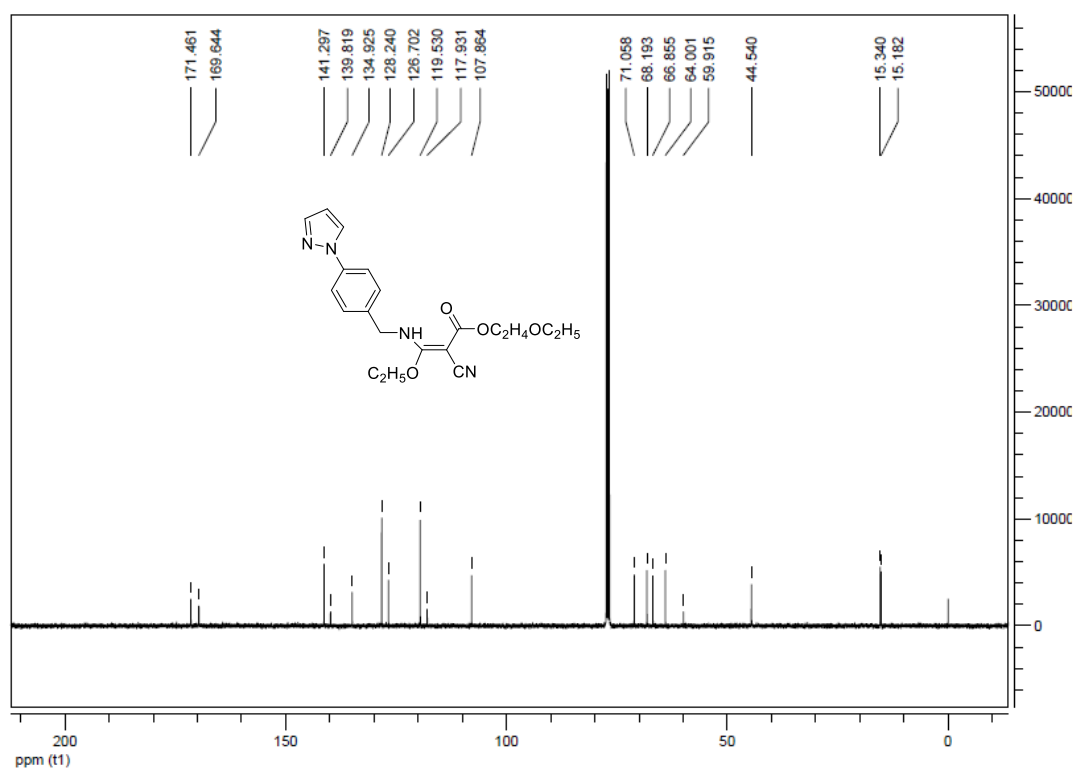

**Figure S38.**  $^{13}\text{C}$ -NMR of compound **10f** (100 MHz,  $\text{CDCl}_3$ )

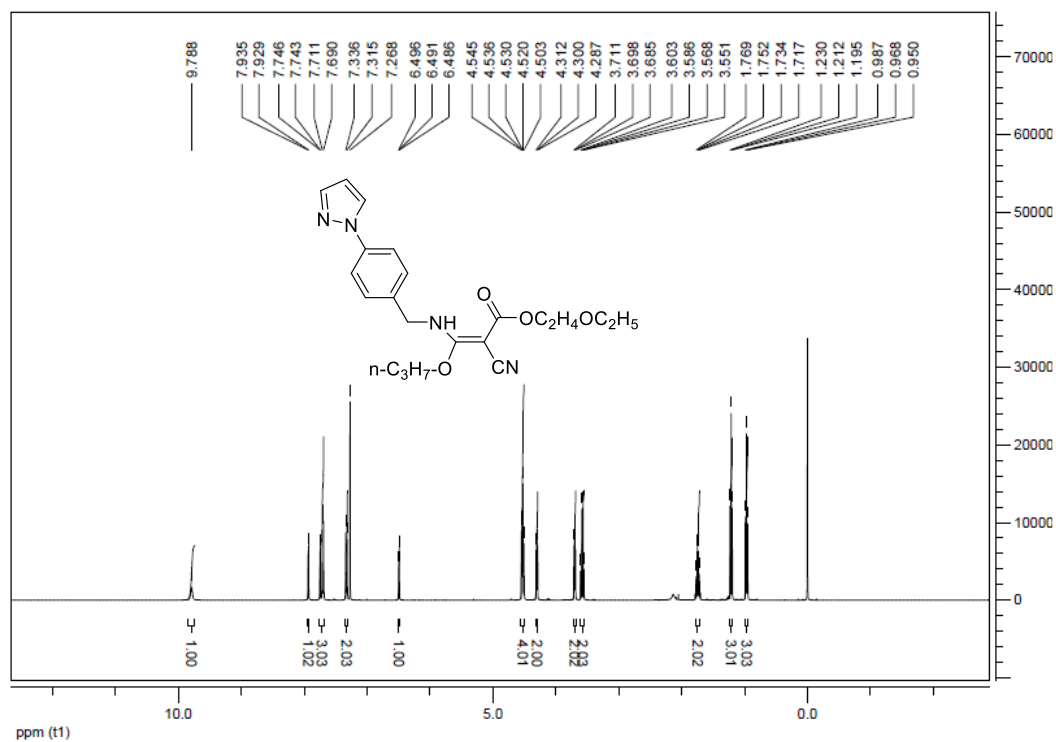

**Figure S39.** <sup>1</sup>H-NMR of compound **10g** (400 MHz, CDCl<sub>3</sub>)

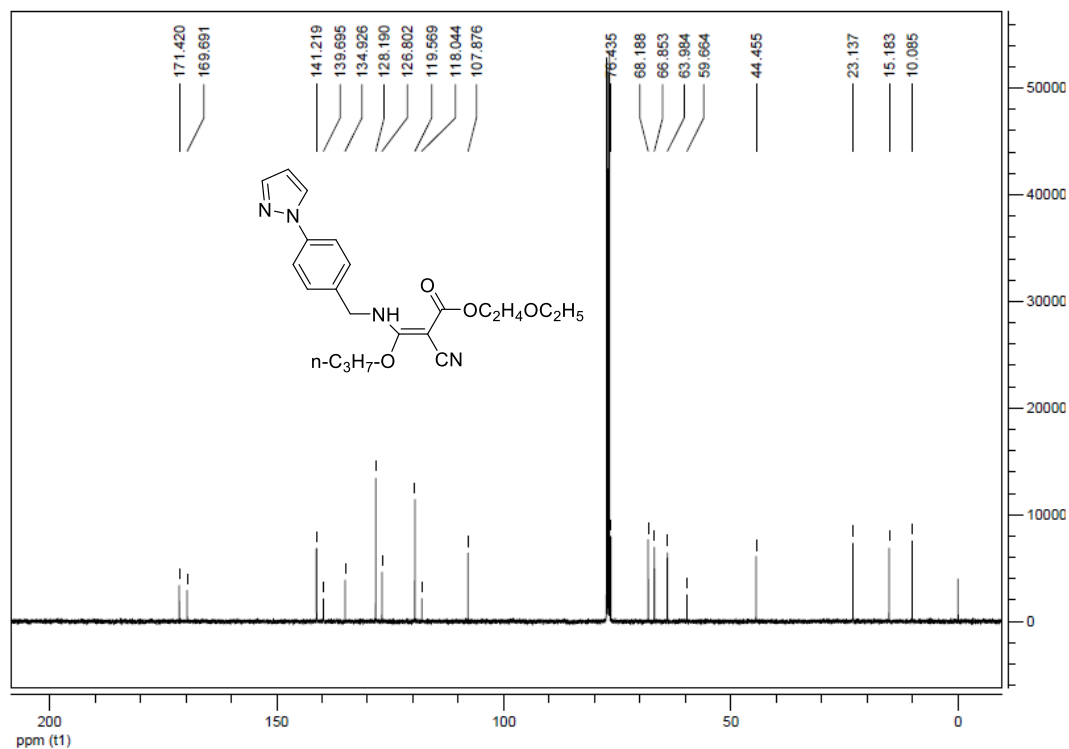

**Figure S40.** <sup>13</sup>C-NMR of compound **10g** (100 MHz, CDCl<sub>3</sub>)

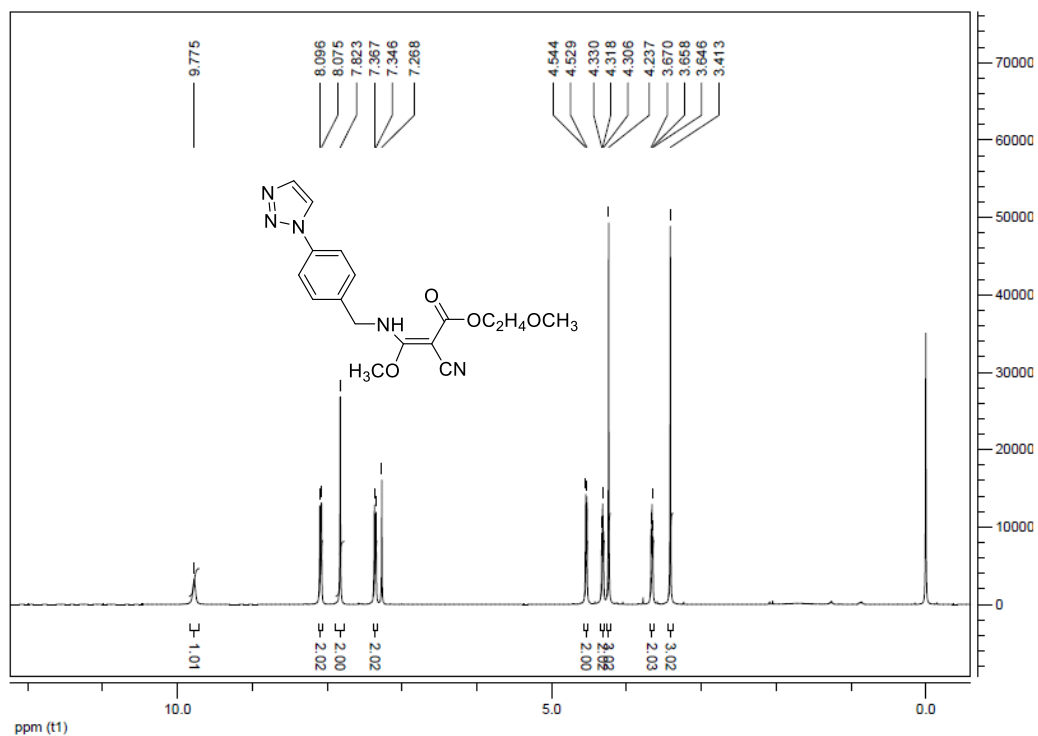

**Figure S41.** <sup>1</sup>H-NMR of compound **10h** (400 MHz, CDCl<sub>3</sub>)

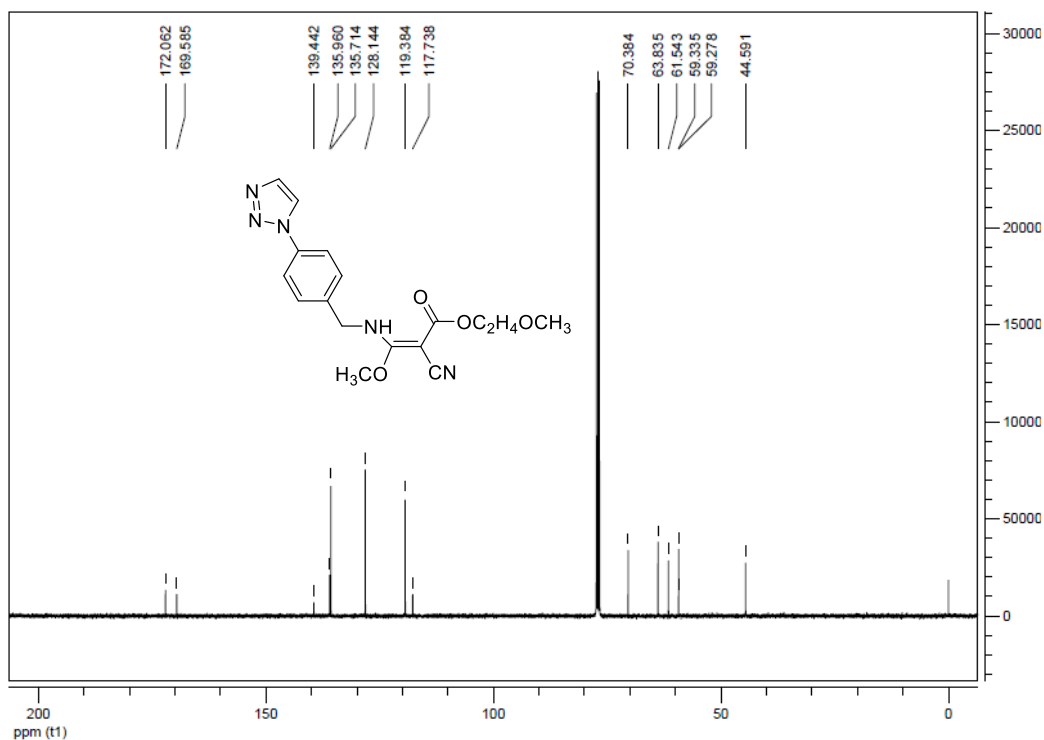

**Figure S42.** <sup>13</sup>C-NMR of compound **10h** (100 MHz, CDCl<sub>3</sub>)

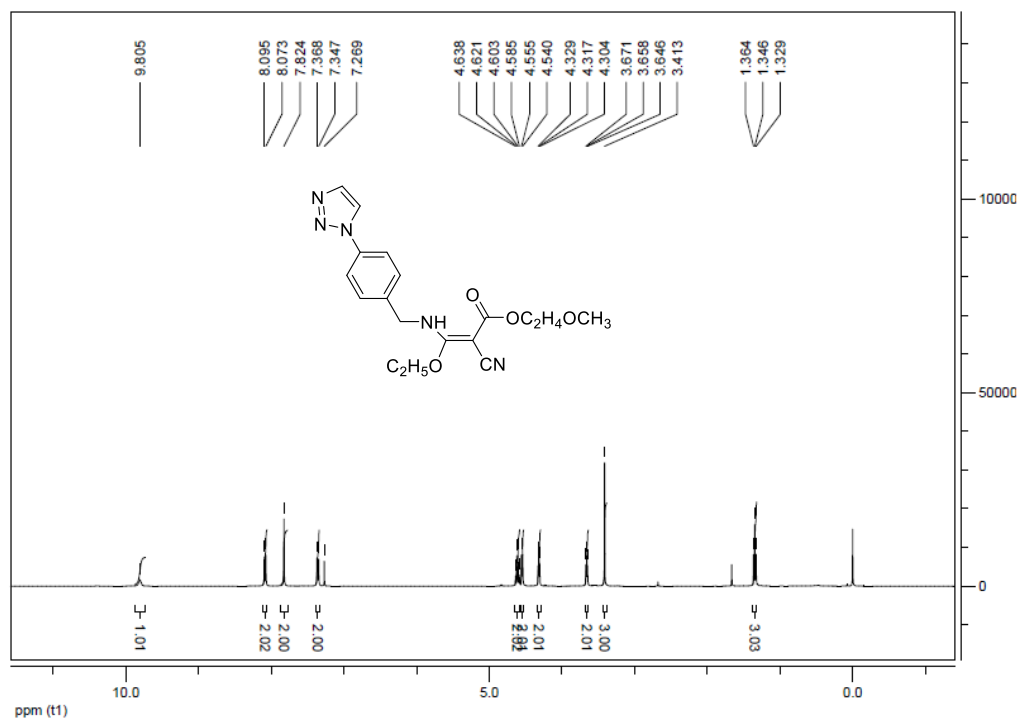

**Figure S43.** <sup>1</sup>H-NMR of compound **10i** (400 MHz, CDCl<sub>3</sub>)

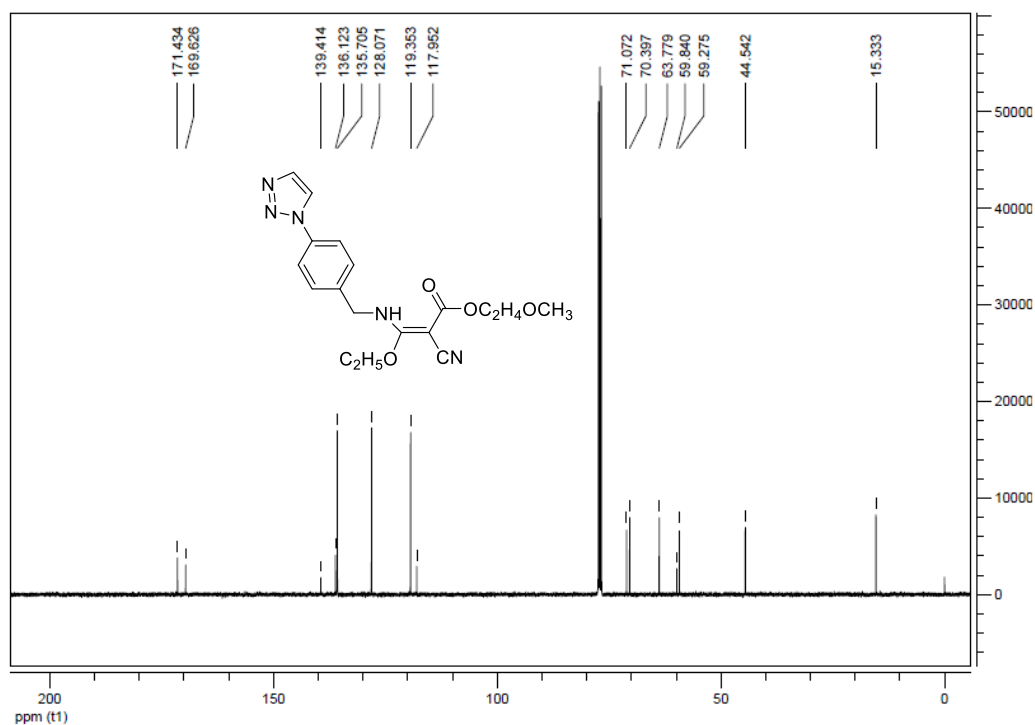

**Figure S44.** <sup>13</sup>C-NMR of compound **10i** (100 MHz, CDCl<sub>3</sub>)

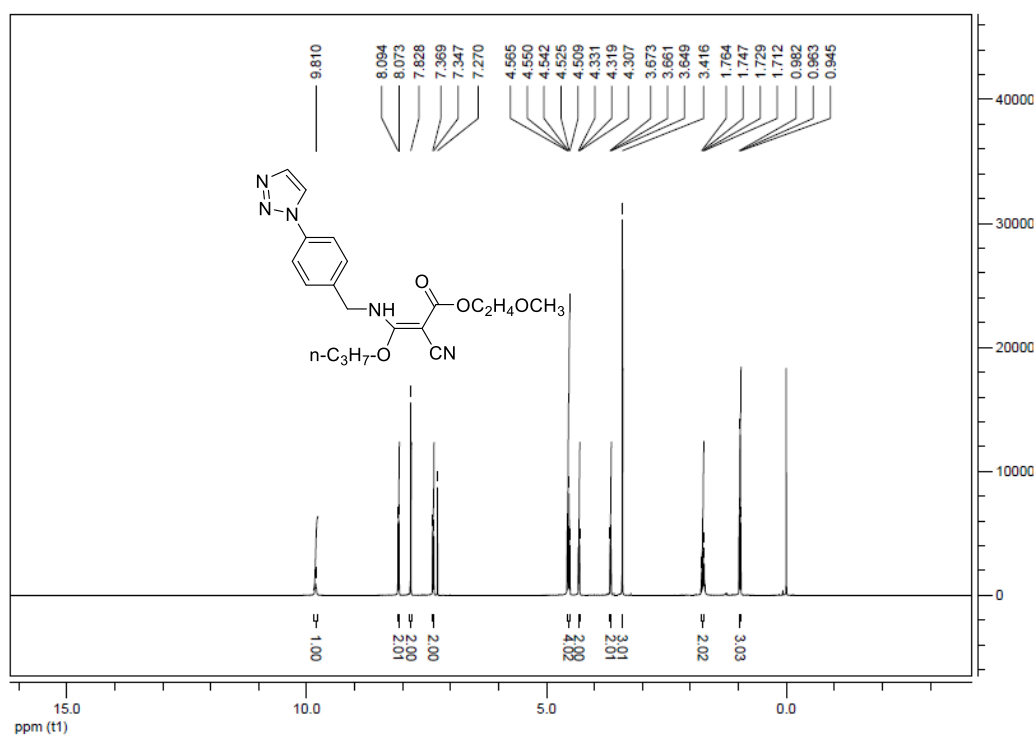

**Figure S45.** <sup>1</sup>H-NMR of compound **10j** (400 MHz, CDCl<sub>3</sub>)

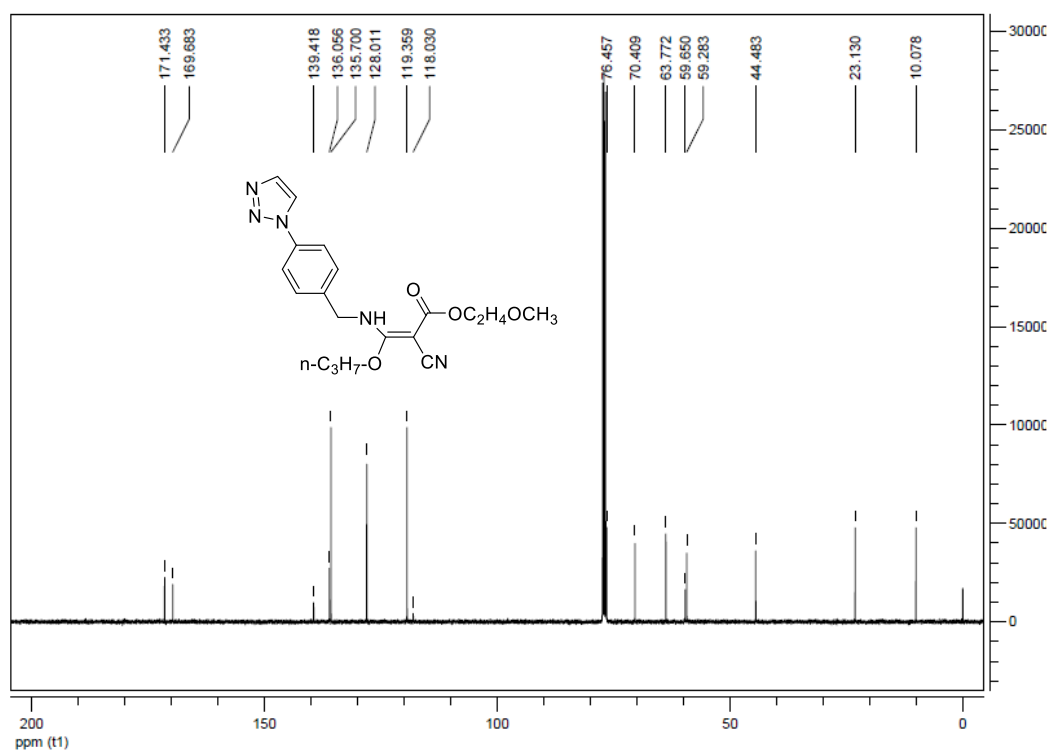

**Figure S46.** <sup>13</sup>C-NMR of compound **10j** (100 MHz, CDCl<sub>3</sub>)



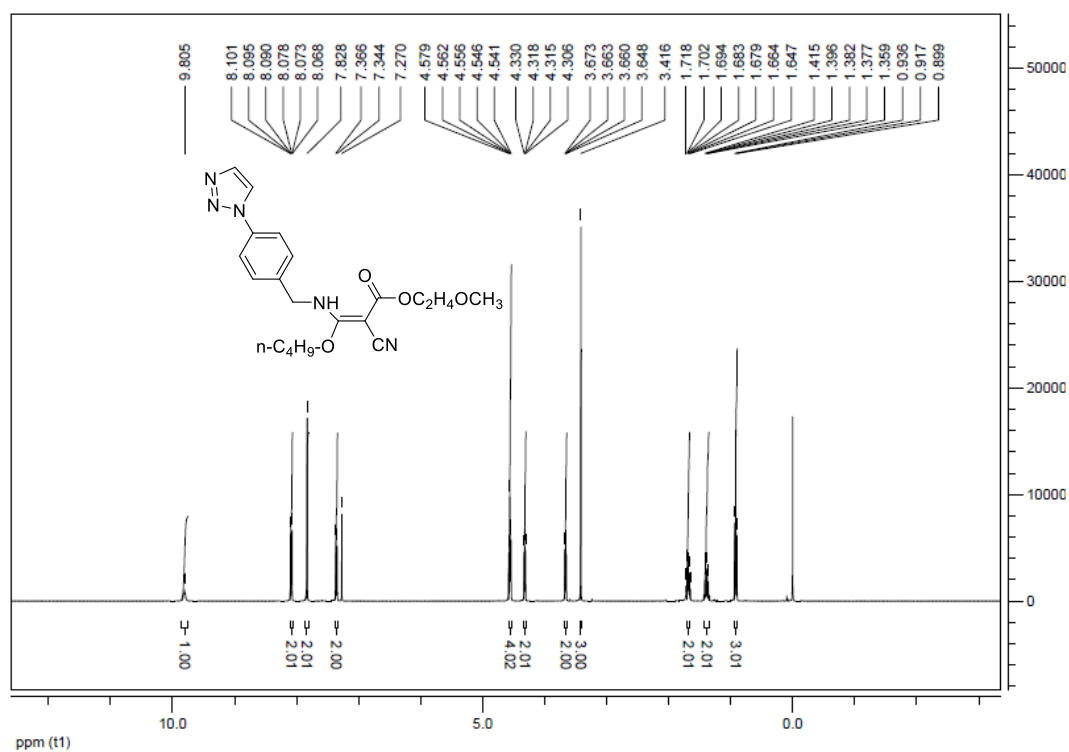

**Figure S47.** <sup>1</sup>H-NMR of compound **10k** (400 MHz, CDCl<sub>3</sub>)

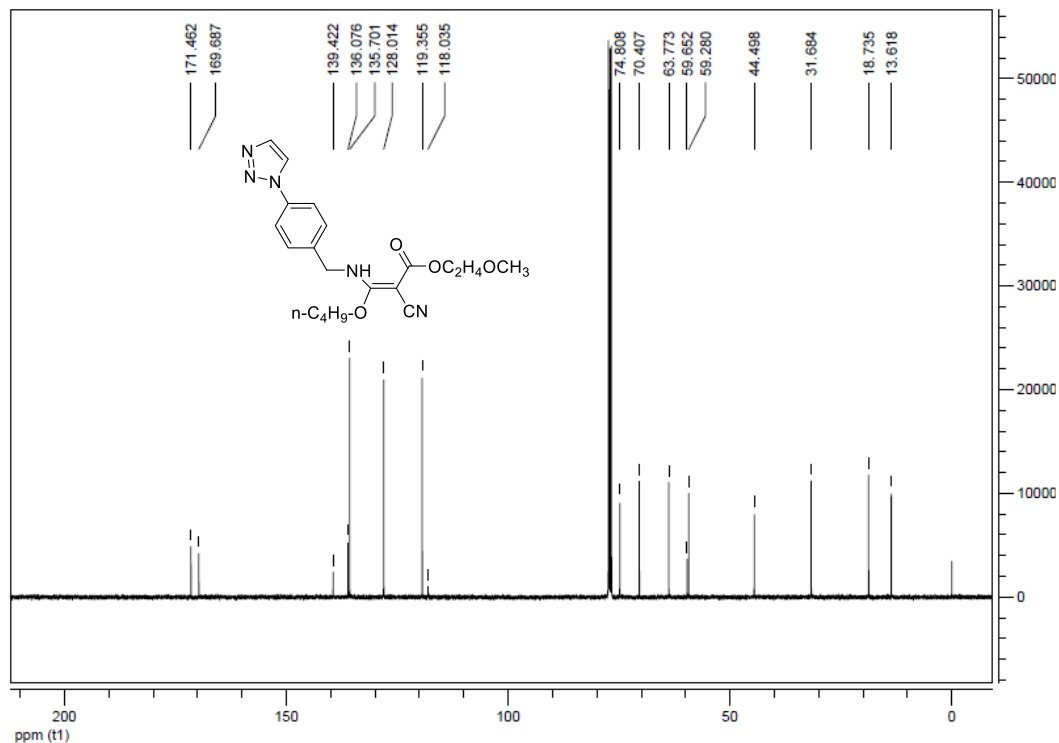

**Figure S48.** <sup>13</sup>C-NMR of compound **10k** (100 MHz, CDCl<sub>3</sub>)

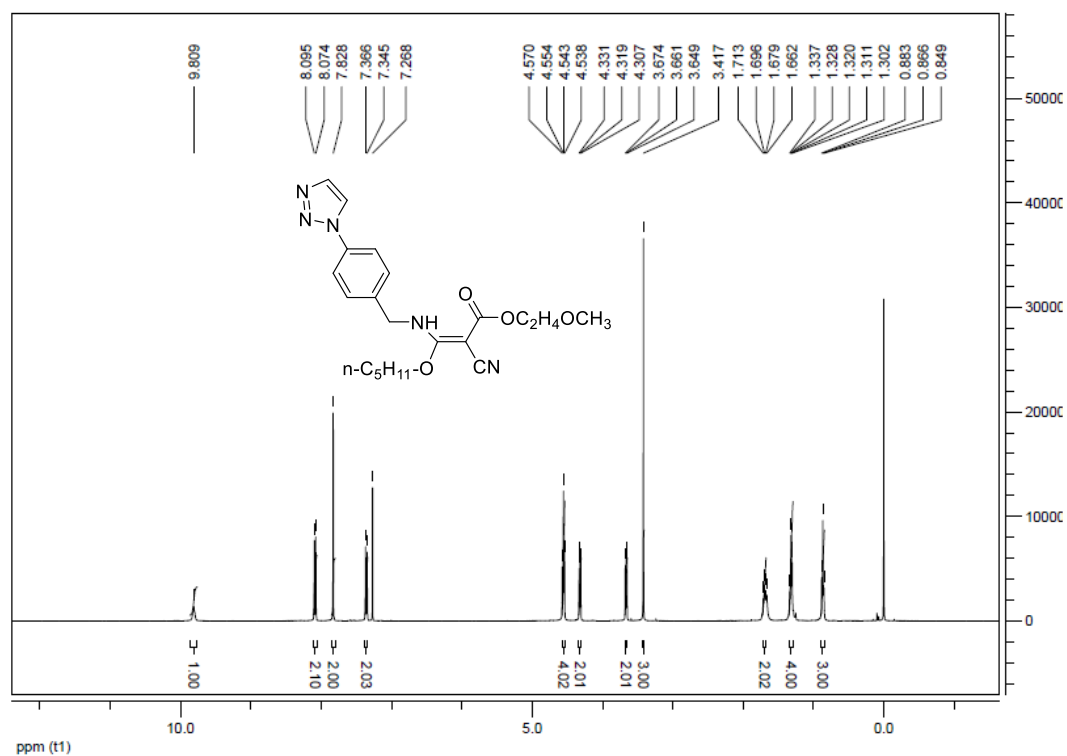

**Figure S49.** <sup>1</sup>H-NMR of compound **10l** (400 MHz, CDCl<sub>3</sub>)

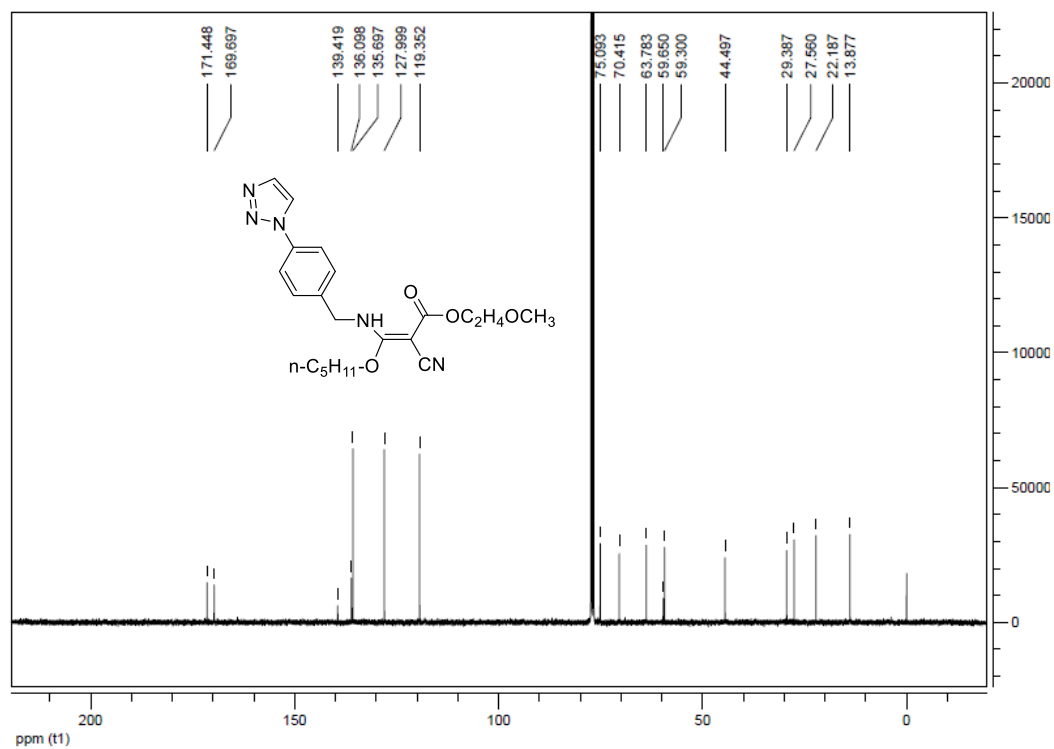

**Figure S50.** <sup>13</sup>C-NMR of compound **10l** (100 MHz, CDCl<sub>3</sub>)

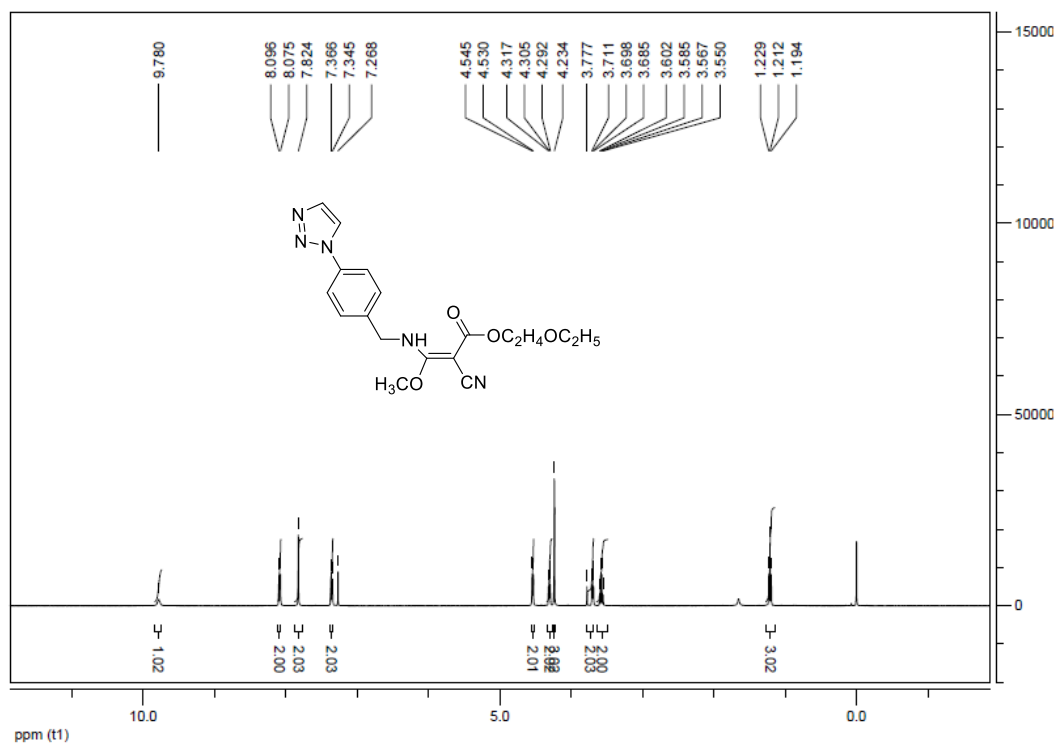

**Figure S51.** <sup>1</sup>H-NMR of compound **10m** (400 MHz, CDCl<sub>3</sub>)

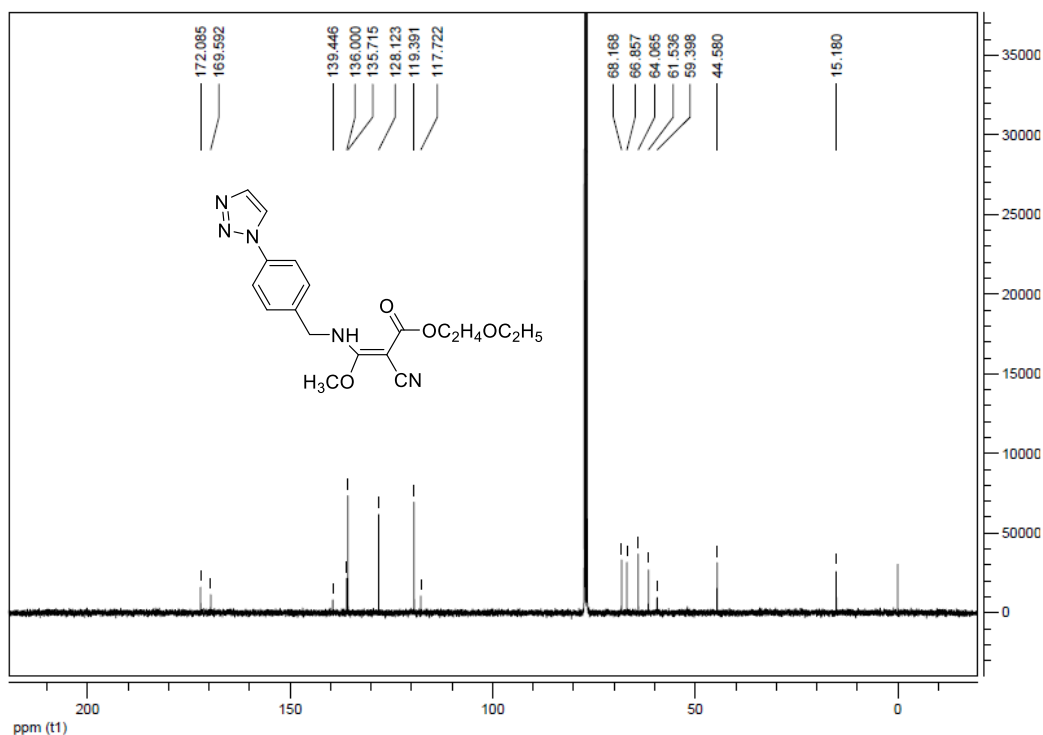

**Figure S52.** <sup>13</sup>C-NMR of compound **10m** (100 MHz, CDCl<sub>3</sub>)

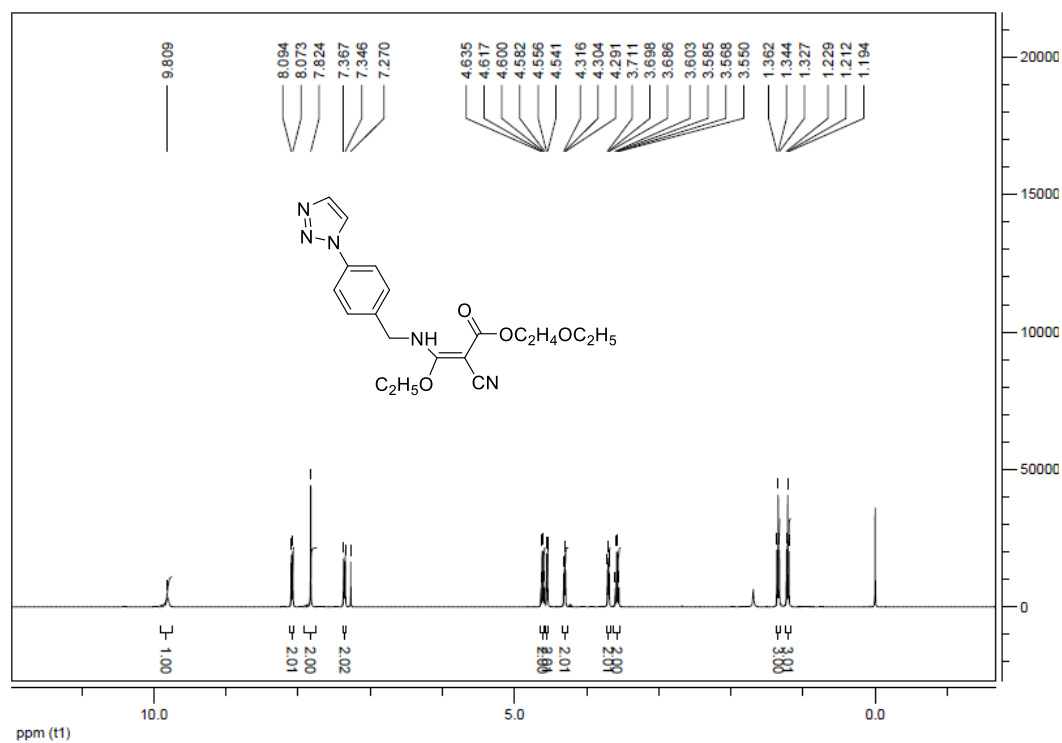

**Figure S53.** <sup>1</sup>H-NMR of compound **10n** (400 MHz, CDCl<sub>3</sub>)

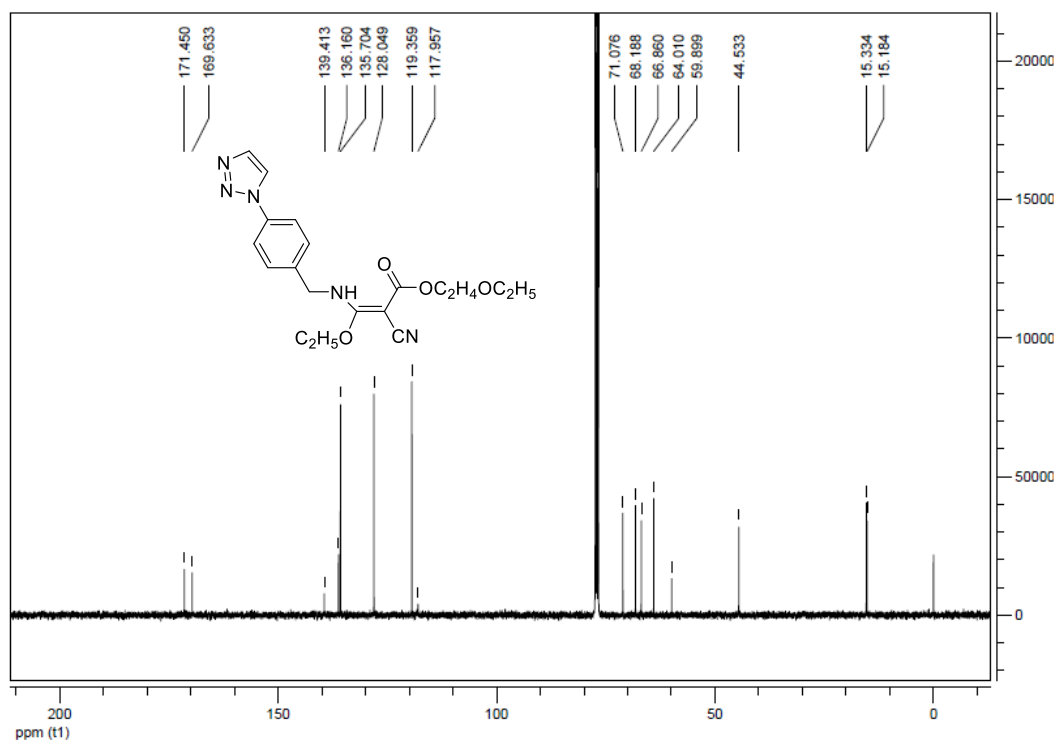

**Figure S54.** <sup>13</sup>C-NMR of compound **10n** (100 MHz, CDCl<sub>3</sub>)

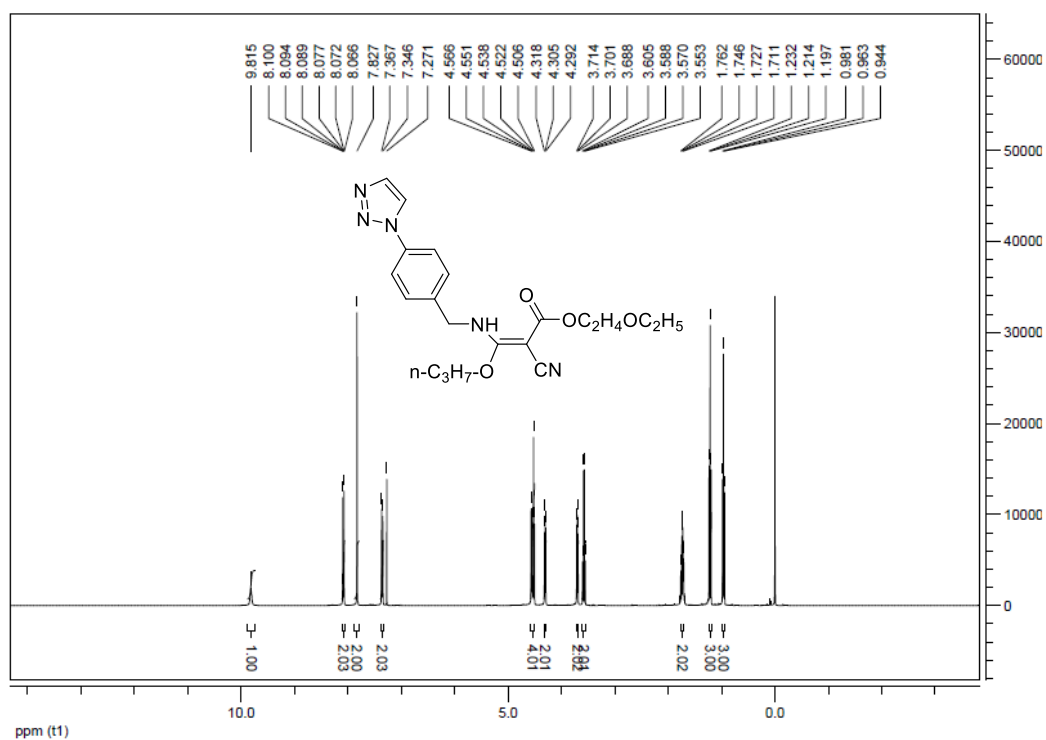

**Figure S55.** <sup>1</sup>H-NMR of compound **10o** (400 MHz, CDCl<sub>3</sub>)

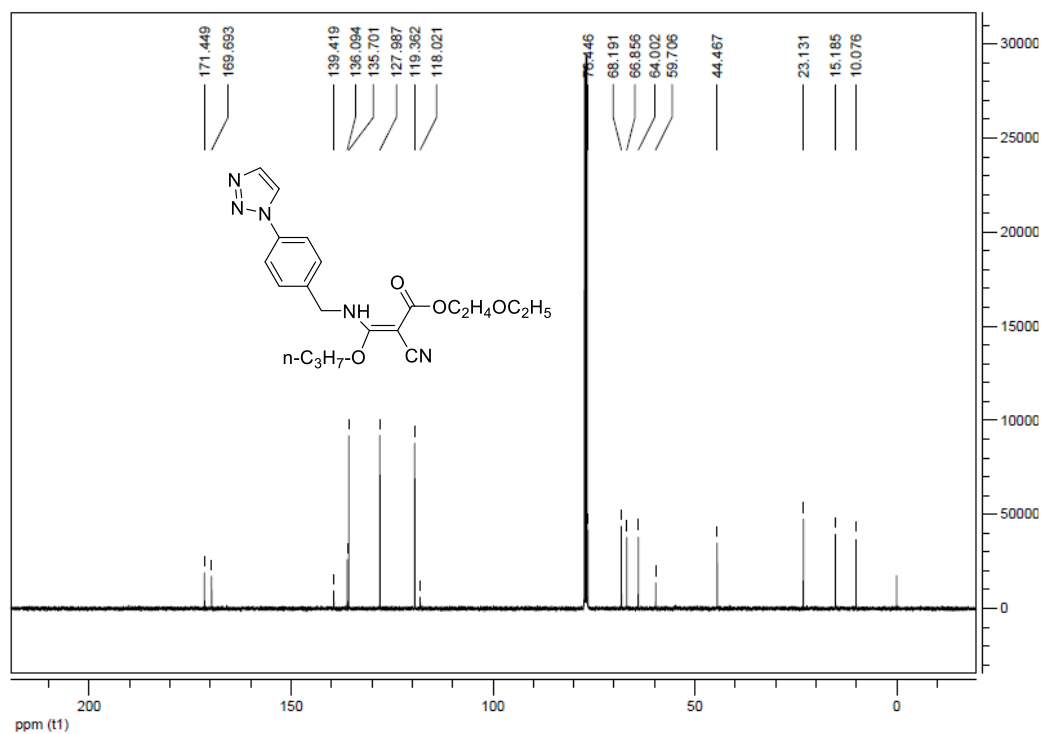

**Figure S56.** <sup>13</sup>C-NMR of compound **10o** (100 MHz, CDCl<sub>3</sub>)
